# Supplementary material for: A carnivorous plant genetic map: pitcher/insect-capture QTL on a genetic linkage map of Sarracenia
Source: Life Sci Alliance. 2018 Nov 29;1(6):e201800146. doi: 10.26508/lsa.201800146 (PMC6265660; doi:10.26508/lsa.201800146)
Supplement: Supplemental Information 6 [file Supplemental_Information_6.txt]

May 2018 Sarracenia mapped SSR markers
name	left_oligo	right_oligo	temp	repeat
S10	GTGGTGGCTGAGATTTGGAG	AATCAAAACCCAACACGGC	56°	(T)^13
S150102	AAAGCCAGAGATCACCTGCG	TCCCGCCATTGTTGTCGTAA	61°	(TC)6(AC)6
S151516	TAAGCCAGAAAGCCAGCAGA	GGAACCAGATCATGCATGCG	61°	(AAAAC)5
S151718	AGCCACATATCAGAACACAATGA	GGACCTGAAGGCTTCTGCAA	61°	(GA)6
S154546	AGGACTCCATTTACATAGACGCC	CCCTATCGCCATCGCTTTCT	61°	(TCT)9
S158788	TCAGAACAGTGCTTCAGCCA	GCAATGTCTGTGAGGGGGAA	56°	(AAT)5
S159900	CAGAGCAATAACCTGGGGCA	ATGAGACAACTGCTCGGAGC	56°	(TCT)13
S163132	ACTCCAATGGTTCAACCCCTC	GTGATGAAGCAAACAAAAACAAAAACA	55°	complex
S167980	GAGGTGGTCAATGGGGGAAG	TGCAGAGAGTACGCACAGAG	58°	(TTCTC)5
S168384	TTCTCTTTGGGGTCGGGTTG	GCAACCACAGCACAAGACAC	58°	(TTTC)7
S172526	GCAAAAGCTGGTCTTCAGGC	TGCCTTAACTCATGGCTGTGT	58°	(TGCTGA)5
S176162	CCGGAGTGGAGAGAGAGAGA	AGGGTGAAGAAACGACGGAC	62°	(TTCT)5
S177172	TGGAAAGCGTCACCGTTGTA	TGCATCATAGCACAAAATGACCA	58°	(TTTC)5
S177374	TCACAGTCAGGTTCAGCGTC	ACACTATATTCAACCAGTGACGAGA	58°	(TTTG)5
S202122	ATAGGCGCACCACTCCAC	AAAGAACCGAGCCCAGCC	62°	(CTT)8
S203536	ATTGCGTGACGTCTCCGG	ACAACCAGGGTTTCCAGGG	62°	(TC)7(GC)7
