# Supplementary material for: A carnivorous plant genetic map: pitcher/insect-capture QTL on a genetic linkage map of Sarracenia
Source: Life Sci Alliance. 2018 Nov 29;1(6):e201800146. doi: 10.26508/lsa.201800146 (PMC6265660; doi:10.26508/lsa.201800146)
Supplement: Supplemental Information 7 [file Supplemental_Information_7.txt]

QTL nearest,marker,type,LG,pos,B2G Tags,Description,#Hits,e-Value,sim mean,#GO,GO IDs,GO Names,Enzyme Codes,Enzyme Names,InterPro IDs,InterPro GO IDs,InterPro GO Names
,RI284,R,1,0.0,"INTERPRO, BLASTED, MAPPED, GO-SLIM",60S acidic ribosomal protein P1-like,20,1.12166E-10,91,3,F:GO:0003735; C:GO:0005840; P:GO:0006412,F:structural constituent of ribosome; C:ribosome; P:translation,,,no IPS match,no IPS match,no IPS match
,D179172,D,1,4.4,"INTERPRO, BLASTED",NAC domain-containing protein,2,5.64333E-07,70.24,,,,,,mobidb-lite (MOBIDB_LITE),no GO terms,no GO terms
,D65266,D,1,6.0,"INTERPRO, NO-BLAST",---NA---,,,,,,,,,no IPS match,no IPS match,no IPS match
numpitch-9,RI809,R,1,7.5,"INTERPRO, BLASTED, MAPPED, GO-SLIM",60S ribosomal protein L9-like,20,2.90883E-11,98.21,5,F:GO:0003735; C:GO:0005829; C:GO:0005840; P:GO:0006412; F:GO:0019843,F:structural constituent of ribosome; C:cytosol; C:ribosome; P:translation; F:rRNA binding,,,no IPS match,no IPS match,no IPS match
,RI278,R,1,23.3,"INTERPRO, NO-BLAST",---NA---,,,,,,,,,no IPS match,no IPS match,no IPS match
,RI277,R,1,24.8,"INTERPRO, BLASTED, MAPPED",membrane steroid-binding protein 2-like,11,1.21184E-07,78.82,4,C:GO:0012505; C:GO:0016020; C:GO:0016021; F:GO:0020037,C:endomembrane system; C:membrane; C:integral component of membrane; F:heme binding,,,no IPS match,no IPS match,no IPS match
,RI1509,R,1,29.0,"INTERPRO, NO-BLAST",---NA---,,,,,,,,,no IPS match,no IPS match,no IPS match
,RI1153,R,1,49.2,"INTERPRO, BLASTED, MAPPED, GO-SLIM",hemiasterlin resistant protein 1-like,20,4.12227E-23,96.63,3,C:GO:0005634; C:GO:0005739; P:GO:0007005,C:nucleus; C:mitochondrion; P:mitochondrion organization,,,IPR010625 (PFAM); PTHR13523 (PANTHER); PTHR13523:SF9 (PANTHER); IPR009069 (SUPERFAMILY),no GO terms,no GO terms
,R4857,R,1,54.4,"INTERPRO, BLASTED, MAPPED, GO-SLIM",DUF21 domain-containing protein At4g33700 isoform X1,20,2.00615E-07,100,1,C:GO:0005886,C:plasma membrane,,,no IPS match,no IPS match,no IPS match
,R4860,R,1,57.4,"INTERPRO, BLASTED, MAPPED, GO-SLIM",DUF21 domain-containing protein,20,1.89766E-20,78.11,1,C:GO:0005575,C:cellular_component,,,no IPS match,no IPS match,no IPS match
,RI1479,R,1,68.9,"INTERPRO, BLASTED",transcription initiation factor TFIID subunit 1-like,3,0.00068107,88.41,,,,,,no IPS match,no IPS match,no IPS match
,R1935,R,1,83.4,"INTERPRO, BLASTED, MAPPED, GO-SLIM",40S ribosomal protein S25-2,20,7.7839E-18,100,1,C:GO:0005840,C:ribosome,,,no IPS match,no IPS match,no IPS match
radalsym,RI12,R,1,95.0,"INTERPRO, NO-BLAST",---NA---,,,,,,,,,no IPS match,no IPS match,no IPS match
,R6776,R,1,107.3,"INTERPRO, NO-BLAST",---NA---,,,,,,,,,no IPS match,no IPS match,no IPS match
,RI15,R,1,108.0,"INTERPRO, NO-BLAST",---NA---,,,,,,,,,no IPS match,no IPS match,no IPS match
openness-3,R8063,R,1,110.5,"INTERPRO, NO-BLAST",---NA---,,,,,,,,,no IPS match,no IPS match,no IPS match
,R4462,R,1,111.9,"INTERPRO, BLASTED, MAPPED",ubiquitin-60S ribosomal protein L40-like,20,3.55626E-05,100,3,F:GO:0003735; C:GO:0005840; P:GO:0006412,F:structural constituent of ribosome; C:ribosome; P:translation,,,no IPS match,no IPS match,no IPS match
,R5340,R,1,117.0,"INTERPRO, BLASTED, MAPPED, GO-SLIM",(S)-coclaurine N-methyltransferase-like,20,8.49394E-27,99.89,3,P:GO:0006629; F:GO:0008168; P:GO:0009058,P:lipid metabolic process; F:methyltransferase activity; P:biosynthetic process,,,no IPS match,no IPS match,no IPS match
,R8281,R,1,119.5,"INTERPRO, BLASTED",selenoprotein H,20,7.16377E-24,91.57,,,,,,no IPS match,no IPS match,no IPS match
,RI950,R,1,129.4,"INTERPRO, BLASTED, MAPPED, GO-SLIM",cytochrome b-c1 complex subunit 6,20,1.85452E-19,96.76,6,C:GO:0005739; P:GO:0006091; F:GO:0016491; C:GO:0032991; P:GO:0034641; P:GO:0044281,C:mitochondrion; P:generation of precursor metabolites and energy; F:oxidoreductase activity; C:protein-containing complex; P:cellular nitrogen compound metabolic process; P:small molecule metabolic process,EC:1.10.2; EC:1.10.2.2,Acting on diphenols and related substances as donors; Quinol--cytochrome-c reductase,no IPS match,no IPS match,no IPS match
,R3682,R,1,133.2,"INTERPRO, BLASTED, MAPPED, GO-SLIM","ubiquinol oxidase, mitochondrial-like",20,2.05463E-22,95.53,3,C:GO:0005575; F:GO:0016491; F:GO:0043167,C:cellular_component; F:oxidoreductase activity; F:ion binding,EC:1.10.3.11; EC:1.10.3,Ubiquinol oxidase (non-electrogenic); Acting on diphenols and related substances as donors,IPR002680 (PFAM); IPR038659 (G3DSA:1.20.1260.GENE3D); IPR002680 (PANTHER); PTHR31803:SF6 (PANTHER),F:GO:0009916; P:GO:0055114,F:alternative oxidase activity; P:oxidation-reduction process
periotuk-5,D482610,D,1,142.9,"INTERPRO, NO-BLAST",---NA---,,,,,,,,,no IPS match,no IPS match,no IPS match
,RI570,R,1,147.0,"INTERPRO, BLASTED",hypersensitive-induced response protein 4,20,4.12874E-24,98.19,,,,,,no IPS match,no IPS match,no IPS match
,D324533,D,1,152.7,"INTERPRO, NO-BLAST",---NA---,,,,,,,,,no IPS match,no IPS match,no IPS match
,D353666,D,1,160.4,"INTERPRO, NO-BLAST",---NA---,,,,,,,,,no IPS match,no IPS match,no IPS match
,D420789,D,1,165.1,"INTERPRO, NO-BLAST",---NA---,,,,,,,,,no IPS match,no IPS match,no IPS match
,D72256,D,1,171.0,"INTERPRO, BLASTED, MAPPED",transcription factor HHO3-like,11,8.80743E-06,92.25,4,F:GO:0003677; C:GO:0005634; P:GO:0006351; P:GO:0006355,"F:DNA binding; C:nucleus; P:transcription, DNA-templated; P:regulation of transcription, DNA-templated",,,no IPS match,no IPS match,no IPS match
"periotuk-4, fenestra-5",D284377,D,1,189.9,"INTERPRO, BLASTED, MAPPED, GO-SLIM",E3 ubiquitin protein ligase RIE1,20,4.51109E-26,95.89,4,C:GO:0005575; P:GO:0006464; P:GO:0009056; F:GO:0016874,C:cellular_component; P:cellular protein modification process; P:catabolic process; F:ligase activity,,,no IPS match,no IPS match,no IPS match
,R879,R,2,0.0,"INTERPRO, NO-BLAST",---NA---,,,,,,,,,no IPS match,no IPS match,no IPS match
,R9394,R,2,28.1,"INTERPRO, BLASTED, MAPPED, GO-SLIM",60S ribosomal protein l3-like,20,7.34522E-14,99.68,3,F:GO:0003735; C:GO:0005840; P:GO:0006412,F:structural constituent of ribosome; C:ribosome; P:translation,,,no IPS match,no IPS match,no IPS match
,R5449,R,2,28.1,"INTERPRO, BLASTED, MAPPED, GO-SLIM",alcohol dehydrogenase,20,4.66272E-19,95.83,2,F:GO:0016491; F:GO:0043167,F:oxidoreductase activity; F:ion binding,EC:1.1.1.1,Alcohol dehydrogenase,no IPS match,no IPS match,no IPS match
,R9393,R,2,30.1,"INTERPRO, BLASTED, MAPPED, GO-SLIM",60S ribosomal protein l3-like,20,4.76507E-08,99.78,3,F:GO:0003735; C:GO:0005840; P:GO:0006412,F:structural constituent of ribosome; C:ribosome; P:translation,,,no IPS match,no IPS match,no IPS match
"curvatur, fenestra-4",D35350,D,2,37.5,"INTERPRO, BLASTED, MAPPED",dolichyl-diphosphooligosaccharide--protein glycosyltransferase subunit STT3A,4,0.000176095,96.09,5,F:GO:0004576; P:GO:0006486; C:GO:0016020; C:GO:0016021; F:GO:0016740,F:oligosaccharyl transferase activity; P:protein glycosylation; C:membrane; C:integral component of membrane; F:transferase activity,,,no IPS match,no IPS match,no IPS match
,D192110,D,2,41.7,"INTERPRO, BLASTED, MAPPED","histone-lysine N-methyltransferase, H3 lysine-9 specific SUVH4 isoform X1",20,3.26371E-05,81.46,11,C:GO:0005634; C:GO:0005694; P:GO:0008152; F:GO:0008168; F:GO:0008270; P:GO:0016571; F:GO:0016740; F:GO:0016758; F:GO:0018024; P:GO:0032259; P:GO:0034968,"C:nucleus; C:chromosome; P:metabolic process; F:methyltransferase activity; F:zinc ion binding; P:histone methylation; F:transferase activity; F:transferase activity, transferring hexosyl groups; F:histone-lysine N-methyltransferase activity; P:methylation; P:histone lysine methylation",,,no IPS match,no IPS match,no IPS match
,R5717,R,2,49.3,"INTERPRO, NO-BLAST",---NA---,,,,,,,,,no IPS match,no IPS match,no IPS match
,R5716,R,2,49.3,"INTERPRO, NO-BLAST",---NA---,,,,,,,,,no IPS match,no IPS match,no IPS match
,R30,R,2,51.9,"INTERPRO, NO-BLAST",---NA---,,,,,,,,,no IPS match,no IPS match,no IPS match
,R5714,R,2,53.6,"INTERPRO, NO-BLAST",---NA---,,,,,,,,,no IPS match,no IPS match,no IPS match
,R5715,R,2,54.3,"INTERPRO, NO-BLAST",---NA---,,,,,,,,,no IPS match,no IPS match,no IPS match
numpitch-6,R8150,R,2,59.0,"INTERPRO, NO-BLAST",---NA---,,,,,,,,,no IPS match,no IPS match,no IPS match
,R816,R,2,61.6,"INTERPRO, NO-BLAST",---NA---,,,,,,,,,no IPS match,no IPS match,no IPS match
,R7268,R,2,64.4,"INTERPRO, BLASTED, MAPPED, GO-SLIM","30S ribosomal protein S13, chloroplastic",20,7.51886E-26,99.89,6,F:GO:0003723; F:GO:0003735; C:GO:0005829; C:GO:0005840; P:GO:0006412; P:GO:0042254,F:RNA binding; F:structural constituent of ribosome; C:cytosol; C:ribosome; P:translation; P:ribosome biogenesis,,,IPR027437 (G3DSA:4.10.910.GENE3D); IPR001892 (PFAM); IPR019980 (PTHR10871:PANTHER); PTHR10871 (PANTHER); IPR001892 (PROSITE_PROFILES); IPR010979 (SUPERFAMILY),F:GO:0003676; F:GO:0003723; F:GO:0003735; C:GO:0005622; C:GO:0005840; P:GO:0006412,F:nucleic acid binding; F:RNA binding; F:structural constituent of ribosome; C:intracellular; C:ribosome; P:translation
,RI1053,R,2,66.5,"INTERPRO, BLASTED, MAPPED, GO-SLIM",60S ribosomal protein L31-like,20,1.72703E-11,99.82,3,F:GO:0003735; C:GO:0005840; P:GO:0006412,F:structural constituent of ribosome; C:ribosome; P:translation,,,no IPS match,no IPS match,no IPS match
,R4212,R,2,68.3,"INTERPRO, NO-BLAST",---NA---,,,,,,,,,no IPS match,no IPS match,no IPS match
,RI486,R,2,69.9,"INTERPRO, NO-BLAST",---NA---,,,,,,,,,no IPS match,no IPS match,no IPS match
,R4159,R,2,73.3,"INTERPRO, BLASTED, MAPPED, GO-SLIM",pre-mRNA cleavage factor Im 25 kDa subunit 1,20,1.53178E-16,94.31,4,F:GO:0003729; C:GO:0005654; P:GO:0006397; C:GO:0032991,F:mRNA binding; C:nucleoplasm; P:mRNA processing; C:protein-containing complex,,,no IPS match,no IPS match,no IPS match
,RI1145,R,2,74.2,"INTERPRO, BLASTED, MAPPED, GO-SLIM",pre-mRNA cleavage factor Im 25 kDa subunit 1,20,2.86894E-14,93.32,4,F:GO:0003729; C:GO:0005654; P:GO:0006397; C:GO:0032991,F:mRNA binding; C:nucleoplasm; P:mRNA processing; C:protein-containing complex,,,mobidb-lite (MOBIDB_LITE),no GO terms,no GO terms
,R7930,R,2,97.2,"INTERPRO, NO-BLAST",---NA---,,,,,,,,,no IPS match,no IPS match,no IPS match
,RI890,R,2,112.1,"INTERPRO, NO-BLAST",---NA---,,,,,,,,,mobidb-lite (MOBIDB_LITE),no GO terms,no GO terms
,RI889,R,2,119.1,"INTERPRO, NO-BLAST",---NA---,,,,,,,,,no IPS match,no IPS match,no IPS match
,D222953,D,2,160.9,"INTERPRO, NO-BLAST",---NA---,,,,,,,,,no IPS match,no IPS match,no IPS match
,R1775,R,3,0.0,"INTERPRO, NO-BLAST",---NA---,,,,,,,,,no IPS match,no IPS match,no IPS match
,R8035,R,3,7.1,"INTERPRO, NO-BLAST",---NA---,,,,,,,,,no IPS match,no IPS match,no IPS match
,D494775,D,3,18.2,"INTERPRO, NO-BLAST",---NA---,,,,,,,,,no IPS match,no IPS match,no IPS match
,R107,R,3,20.4,"INTERPRO, BLASTED, MAPPED, GO-SLIM",glutamine synthetase nodule isozyme,20,1.11582E-25,97.13,5,C:GO:0005737; P:GO:0006520; P:GO:0009058; F:GO:0016874; F:GO:0043167,C:cytoplasm; P:cellular amino acid metabolic process; P:biosynthetic process; F:ligase activity; F:ion binding,EC:6.3.1.2,Glutamine synthetase,PTHR20852 (PANTHER); PTHR20852:SF59 (PANTHER),no GO terms,no GO terms
,R7834,R,3,31.6,"INTERPRO, BLASTED, MAPPED, GO-SLIM",histone H3,20,9.09706E-27,100,6,F:GO:0003677; C:GO:0005634; C:GO:0005694; C:GO:0032991; P:GO:0051276; P:GO:0065003,F:DNA binding; C:nucleus; C:chromosome; C:protein-containing complex; P:chromosome organization; P:protein-containing complex assembly,,,IPR000164 (PRINTS); IPR000164 (SMART); IPR007125 (PFAM); IPR009072 (G3DSA:1.10.20.GENE3D); PTHR11426:SF177 (PANTHER); IPR000164 (PANTHER); IPR009072 (SUPERFAMILY),C:GO:0000786; F:GO:0003677; F:GO:0046982,C:nucleosome; F:DNA binding; F:protein heterodimerization activity
,R4506,R,3,35.9,"INTERPRO, BLASTED, MAPPED, GO-SLIM","probable ATP synthase 24 kDa subunit, mitochondrial",20,4.51423E-22,96.49,1,P:GO:0048856,P:anatomical structure development,,,IPR031432 (PFAM); IPR031432 (PANTHER),P:GO:0009555,P:pollen development
,RI1532,R,3,38.0,"INTERPRO, BLASTED, MAPPED, GO-SLIM","alanine--glyoxylate aminotransferase 2 homolog 1, mitochondrial",20,3.07735E-24,99.89,1,F:GO:0043167,F:ion binding,,,IPR015421 (G3DSA:3.40.640.GENE3D); IPR015424 (SUPERFAMILY),F:GO:0003824,F:catalytic activity
,R943,R,3,39.5,"INTERPRO, NO-BLAST",---NA---,,,,,,,,,no IPS match,no IPS match,no IPS match
,R4507,R,3,40.1,"INTERPRO, NO-BLAST",---NA---,,,,,,,,,no IPS match,no IPS match,no IPS match
,R4511,R,3,40.1,"INTERPRO, BLASTED, MAPPED, GO-SLIM","probable ATP synthase 24 kDa subunit, mitochondrial",20,1.14659E-20,92.77,1,P:GO:0048856,P:anatomical structure development,,,IPR031432 (PFAM); IPR031432 (PANTHER),P:GO:0009555,P:pollen development
,R1470,R,3,41.4,"INTERPRO, NO-BLAST",---NA---,,,,,,,,,no IPS match,no IPS match,no IPS match
heigwing-1,R1469,R,3,42.3,"INTERPRO, BLASTED",protein AE7-like 1,20,3.95333E-14,99.57,,,,,,no IPS match,no IPS match,no IPS match
,RI1139,R,3,49.6,"INTERPRO, NO-BLAST",---NA---,,,,,,,,,no IPS match,no IPS match,no IPS match
smoothzn-7,RI29,R,3,52.0,"INTERPRO, BLASTED, MAPPED, GO-SLIM","50S ribosomal protein L29, chloroplastic",20,6.77412E-11,97.14,4,F:GO:0003735; C:GO:0005829; C:GO:0005840; P:GO:0006412,F:structural constituent of ribosome; C:cytosol; C:ribosome; P:translation,,,no IPS match,no IPS match,no IPS match
,R1276,R,3,57.2,"INTERPRO, BLASTED, MAPPED",probable aldo-keto reductase 3,20,3.63414E-06,91.76,4,C:GO:0005829; F:GO:0016491; P:GO:0046686; P:GO:0055114,C:cytosol; F:oxidoreductase activity; P:response to cadmium ion; P:oxidation-reduction process,,,no IPS match,no IPS match,no IPS match
abovelip-2,RI736,R,3,58.8,"INTERPRO, BLASTED, MAPPED, GO-SLIM",histone H3,20,9.09706E-27,100,6,F:GO:0003677; C:GO:0005634; C:GO:0005694; C:GO:0032991; P:GO:0051276; P:GO:0065003,F:DNA binding; C:nucleus; C:chromosome; C:protein-containing complex; P:chromosome organization; P:protein-containing complex assembly,,,IPR000164 (PRINTS); IPR000164 (SMART); IPR007125 (PFAM); IPR009072 (G3DSA:1.10.20.GENE3D); PTHR11426:SF177 (PANTHER); IPR000164 (PANTHER); IPR009072 (SUPERFAMILY),C:GO:0000786; F:GO:0003677; F:GO:0046982,C:nucleosome; F:DNA binding; F:protein heterodimerization activity
ptnwindw-3,R5391,R,3,74.8,"INTERPRO, NO-BLAST",---NA---,,,,,,,,,no IPS match,no IPS match,no IPS match
openfrac-1,R8309,R,3,83.3,"INTERPRO, NO-BLAST",---NA---,,,,,,,,,no IPS match,no IPS match,no IPS match
,R8307,R,3,83.3,"INTERPRO, BLASTED, MAPPED, GO-SLIM",14-3-3-like protein,20,2.83014E-26,100,1,F:GO:0003674,F:molecular_function,,,no IPS match,no IPS match,no IPS match
openness-1,D63270,D,3,87.0,"INTERPRO, BLASTED, MAPPED, GO-SLIM",NAD(P)-binding Rossmann-fold superfamily protein isoform 2,20,4.47164E-12,98.03,1,C:GO:0005575,C:cellular_component,,,no IPS match,no IPS match,no IPS match
,D104924,D,3,95.5,"INTERPRO, NO-BLAST",---NA---,,,,,,,,,no IPS match,no IPS match,no IPS match
fenestra-1,D303799,D,3,108.1,"INTERPRO, NO-BLAST",---NA---,,,,,,,,,no IPS match,no IPS match,no IPS match
"veinprom, deggreen",R3403,R,3,111.2,"INTERPRO, NO-BLAST",---NA---,,,,,,,,,no IPS match,no IPS match,no IPS match
heigwing-5,R5859,R,3,116.8,"INTERPRO, BLASTED, MAPPED, GO-SLIM","chorismate mutase 1, chloroplastic-like",20,2.39266E-24,93.3,4,C:GO:0005737; P:GO:0006520; P:GO:0009058; F:GO:0016853,C:cytoplasm; P:cellular amino acid metabolic process; P:biosynthetic process; F:isomerase activity,EC:5.4.99.5,Chorismate mutase,IPR037039 (G3DSA:1.10.590.GENE3D); IPR008238 (PANTHER); PTHR21145:SF0 (PANTHER); IPR036263 (SUPERFAMILY),F:GO:0004106; P:GO:0009073; P:GO:0046417,F:chorismate mutase activity; P:aromatic amino acid family biosynthetic process; P:chorismate metabolic process
smoothzn-2,RI321,R,3,125.7,"INTERPRO, BLASTED, MAPPED, GO-SLIM",40S ribosomal protein S9-2,20,1.11294E-17,99.86,5,F:GO:0003735; C:GO:0005829; C:GO:0005840; P:GO:0006412; F:GO:0019843,F:structural constituent of ribosome; C:cytosol; C:ribosome; P:translation; F:rRNA binding,,,mobidb-lite (MOBIDB_LITE); PTHR11831:SF16 (PANTHER); IPR022801 (PANTHER),no GO terms,no GO terms
,R7815,R,3,129.1,"INTERPRO, NO-BLAST",---NA---,,,,,,,,,no IPS match,no IPS match,no IPS match
,RI641,R,3,134.7,"INTERPRO, NO-BLAST",---NA---,,,,,,,,,mobidb-lite (MOBIDB_LITE),no GO terms,no GO terms
,R9256,R,3,136.7,"INTERPRO, BLASTED, MAPPED, GO-SLIM",Carbonic anhydrase,20,1.38212E-18,87.11,4,P:GO:0008150; C:GO:0009536; F:GO:0016829; F:GO:0043167,P:biological_process; C:plastid; F:lyase activity; F:ion binding,EC:4.2.1.1,Carbonic anhydrase,no IPS match,no IPS match,no IPS match
,R6006,R,3,138.7,"INTERPRO, BLASTED, MAPPED","formate dehydrogenase, mitochondrial",20,5.77743E-06,97.38,8,C:GO:0005739; P:GO:0008152; F:GO:0008863; F:GO:0016491; F:GO:0016616; P:GO:0042183; F:GO:0051287; P:GO:0055114,"C:mitochondrion; P:metabolic process; F:formate dehydrogenase (NAD+) activity; F:oxidoreductase activity; F:oxidoreductase activity, acting on the CH-OH group of donors, NAD or NADP as acceptor; P:formate catabolic process; F:NAD binding; P:oxidation-reduction process",,,no IPS match,no IPS match,no IPS match
,R6009,R,3,138.7,"INTERPRO, BLASTED, MAPPED, GO-SLIM","formate dehydrogenase, mitochondrial",20,1.46751E-26,92.13,4,C:GO:0005739; P:GO:0009056; F:GO:0016491; P:GO:0044281,C:mitochondrion; P:catabolic process; F:oxidoreductase activity; P:small molecule metabolic process,EC:1.2.1.2,Acting on the aldehyde or oxo group of donors,no IPS match,no IPS match,no IPS match
,R9252,R,3,141.1,"INTERPRO, NO-BLAST",---NA---,,,,,,,,,no IPS match,no IPS match,no IPS match
periotuk-2,R6003,R,3,146.7,"INTERPRO, BLASTED, MAPPED","formate dehydrogenase, mitochondrial",20,1.47855E-06,97.5,8,C:GO:0005739; P:GO:0008152; F:GO:0008863; F:GO:0016491; F:GO:0016616; P:GO:0042183; F:GO:0051287; P:GO:0055114,"C:mitochondrion; P:metabolic process; F:formate dehydrogenase (NAD+) activity; F:oxidoreductase activity; F:oxidoreductase activity, acting on the CH-OH group of donors, NAD or NADP as acceptor; P:formate catabolic process; F:NAD binding; P:oxidation-reduction process",,,no IPS match,no IPS match,no IPS match
,RI1552,R,4,0.0,"INTERPRO, NO-BLAST",---NA---,,,,,,,,,no IPS match,no IPS match,no IPS match
,R7285,R,4,32.2,"INTERPRO, BLASTED",Phosphoglycerate mutase family protein isoform 1,20,6.86445E-24,95.69,,,,,,no IPS match,no IPS match,no IPS match
,R6789,R,4,35.3,"INTERPRO, BLASTED, MAPPED, GO-SLIM",Phosphoglycerate mutase family protein isoform 1,20,7.81263E-15,95.15,1,C:GO:0005575,C:cellular_component,,,no IPS match,no IPS match,no IPS match
,R4849,R,4,37.6,"INTERPRO, NO-BLAST",---NA---,,,,,,,,,no IPS match,no IPS match,no IPS match
,R8080,R,4,39.4,"INTERPRO, BLASTED, MAPPED","chlorophyll a-b binding protein CP26, chloroplastic",20,5.34856E-06,97.27,12,C:GO:0009507; C:GO:0009522; C:GO:0009523; C:GO:0009535; C:GO:0009536; C:GO:0009579; P:GO:0009765; P:GO:0015979; C:GO:0016020; C:GO:0016021; F:GO:0016168; P:GO:0018298,"C:chloroplast; C:photosystem I; C:photosystem II; C:chloroplast thylakoid membrane; C:plastid; C:thylakoid; P:photosynthesis, light harvesting; P:photosynthesis; C:membrane; C:integral component of membrane; F:chlorophyll binding; P:protein-chromophore linkage",,,no IPS match,no IPS match,no IPS match
,D371790,D,4,46.1,"INTERPRO, NO-BLAST",---NA---,,,,,,,,,mobidb-lite (MOBIDB_LITE),no GO terms,no GO terms
,D239694,D,4,46.4,"INTERPRO, BLASTED, MAPPED, GO-SLIM",pentatricopeptide repeat-containing protein At3g47530,20,7.99144E-23,94.25,3,F:GO:0003723; F:GO:0004518; F:GO:0043167,F:RNA binding; F:nuclease activity; F:ion binding,EC:3.1.31; EC:3.1.27; EC:3.1.27.1,Acting on ester bonds; Acting on ester bonds; Ribonuclease T(2),no IPS match,no IPS match,no IPS match
,D464791,D,4,47.7,"INTERPRO, NO-BLAST",---NA---,,,,,,,,,no IPS match,no IPS match,no IPS match
,R8087,R,4,48.8,"INTERPRO, BLASTED, MAPPED, GO-SLIM","chlorophyll a-b binding protein CP26, chloroplastic",20,1.32682E-25,99.15,7,P:GO:0006091; P:GO:0006464; C:GO:0009536; C:GO:0009579; P:GO:0015979; C:GO:0032991; F:GO:0043167,P:generation of precursor metabolites and energy; P:cellular protein modification process; C:plastid; C:thylakoid; P:photosynthesis; C:protein-containing complex; F:ion binding,,,no IPS match,no IPS match,no IPS match
smoothzn-5,R9402,R,4,49.3,"INTERPRO, BLASTED, MAPPED, GO-SLIM",superoxide dismutase [Cu-Zn] 2,20,4.38986E-24,93.62,14,P:GO:0000003; P:GO:0000902; C:GO:0005615; C:GO:0005618; C:GO:0005634; C:GO:0005773; C:GO:0005777; C:GO:0005829; P:GO:0006950; F:GO:0016491; P:GO:0030154; P:GO:0040007; F:GO:0043167; P:GO:0071554,P:reproduction; P:cell morphogenesis; C:extracellular space; C:cell wall; C:nucleus; C:vacuole; C:peroxisome; C:cytosol; P:response to stress; F:oxidoreductase activity; P:cell differentiation; P:growth; F:ion binding; P:cell wall organization or biogenesis,EC:1.15.1.1,Superoxide dismutase,IPR001424 (PRINTS); IPR001424 (PFAM); IPR036423 (G3DSA:2.60.40.GENE3D); mobidb-lite (MOBIDB_LITE); PTHR10003:SF31 (PANTHER); IPR024134 (PANTHER); IPR036423 (SUPERFAMILY),P:GO:0006801; F:GO:0046872,P:superoxide metabolic process; F:metal ion binding
,R8743,R,4,51.4,"INTERPRO, NO-BLAST",---NA---,,,,,,,,,no IPS match,no IPS match,no IPS match
,R2870,R,4,61.5,"INTERPRO, BLASTED, MAPPED, GO-SLIM","50S ribosomal protein 5, chloroplastic",20,7.62037E-12,70.65,3,P:GO:0006412; C:GO:0009536; C:GO:0009579,P:translation; C:plastid; C:thylakoid,,,mobidb-lite (MOBIDB_LITE),no GO terms,no GO terms
,RI1366,R,4,61.5,"INTERPRO, BLASTED, MAPPED, GO-SLIM","50S ribosomal protein 5, chloroplastic",20,7.62037E-12,70.65,3,P:GO:0006412; C:GO:0009536; C:GO:0009579,P:translation; C:plastid; C:thylakoid,,,mobidb-lite (MOBIDB_LITE),no GO terms,no GO terms
periotuk-3,R4020,R,4,65.2,"INTERPRO, NO-BLAST",---NA---,,,,,,,,,no IPS match,no IPS match,no IPS match
"lengintr-1, fenestra-6",R8078,R,4,70.3,"INTERPRO, NO-BLAST",---NA---,,,,,,,,,no IPS match,no IPS match,no IPS match
,R1268,R,4,91.5,"INTERPRO, NO-BLAST",---NA---,,,,,,,,,no IPS match,no IPS match,no IPS match
,RI1004,R,4,99.3,"INTERPRO, BLASTED, MAPPED, GO-SLIM",phosphatidylinositol:ceramide inositolphosphotransferase 1,20,2.48887E-17,86.44,5,C:GO:0005737; C:GO:0005794; P:GO:0006629; P:GO:0009058; F:GO:0016757,"C:cytoplasm; C:Golgi apparatus; P:lipid metabolic process; P:biosynthetic process; F:transferase activity, transferring glycosyl groups",EC:2.7.8.27,Sphingomyelin synthase,no IPS match,no IPS match,no IPS match
,R8501,R,4,99.3,"INTERPRO, NO-BLAST",---NA---,,,,,,,,,no IPS match,no IPS match,no IPS match
,D163498,D,4,101.8,"INTERPRO, NO-BLAST",---NA---,,,,,,,,,no IPS match,no IPS match,no IPS match
numpitch-7,R3585,R,4,109.1,"INTERPRO, BLASTED, MAPPED, GO-SLIM",phosphatidylinositol:ceramide inositolphosphotransferase 1,20,2.50089E-17,86.44,5,C:GO:0005737; C:GO:0005794; P:GO:0006629; P:GO:0009058; F:GO:0016757,"C:cytoplasm; C:Golgi apparatus; P:lipid metabolic process; P:biosynthetic process; F:transferase activity, transferring glycosyl groups",EC:2.7.8.27,Sphingomyelin synthase,no IPS match,no IPS match,no IPS match
fenestra-9,R8498,R,4,120.8,"INTERPRO, NO-BLAST",---NA---,,,,,,,,,no IPS match,no IPS match,no IPS match
,R3692,R,5,0.0,"INTERPRO, NO-BLAST",---NA---,,,,,,,,,mobidb-lite (MOBIDB_LITE),no GO terms,no GO terms
,RI1227,R,5,12.5,"INTERPRO, BLASTED, MAPPED, GO-SLIM",60S ribosomal protein L35a-1,20,2.39829E-31,96.6,5,F:GO:0003735; C:GO:0005829; C:GO:0005840; P:GO:0006412; P:GO:0042254,F:structural constituent of ribosome; C:cytosol; C:ribosome; P:translation; P:ribosome biogenesis,,,IPR001780 (PFAM); IPR038661 (G3DSA:2.40.10.GENE3D); PTHR10902:SF11 (PANTHER); IPR001780 (PANTHER); IPR001780 (PRODOM); IPR009000 (SUPERFAMILY),F:GO:0003735; C:GO:0005622; C:GO:0005840; P:GO:0006412,F:structural constituent of ribosome; C:intracellular; C:ribosome; P:translation
,R3993,R,5,30.4,"INTERPRO, NO-BLAST",---NA---,,,,,,,,,no IPS match,no IPS match,no IPS match
,D205731,D,5,34.8,"INTERPRO, NO-BLAST",---NA---,,,,,,,,,no IPS match,no IPS match,no IPS match
,D125880,D,5,40.8,"INTERPRO, NO-BLAST",---NA---,,,,,,,,,no IPS match,no IPS match,no IPS match
,R3977,R,5,44.1,"INTERPRO, NO-BLAST",---NA---,,,,,,,,,no IPS match,no IPS match,no IPS match
,R3976,R,5,45.4,"INTERPRO, NO-BLAST",---NA---,,,,,,,,,no IPS match,no IPS match,no IPS match
,R3981,R,5,48.2,"INTERPRO, NO-BLAST",---NA---,,,,,,,,,no IPS match,no IPS match,no IPS match
,D67322,D,5,57.4,"INTERPRO, NO-BLAST",---NA---,,,,,,,,,no IPS match,no IPS match,no IPS match
,R1263,R,5,59.8,"INTERPRO, BLASTED, MAPPED, GO-SLIM","superoxide dismutase [Mn], mitochondrial",20,2.37173E-15,99.84,4,C:GO:0005575; P:GO:0006950; F:GO:0016491; F:GO:0043167,C:cellular_component; P:response to stress; F:oxidoreductase activity; F:ion binding,EC:1.15.1.1,Superoxide dismutase,no IPS match,no IPS match,no IPS match
,R5382,R,5,60.3,"INTERPRO, BLASTED, MAPPED, GO-SLIM","superoxide dismutase [Mn], mitochondrial",20,3.62867E-26,100,4,C:GO:0005739; P:GO:0006950; F:GO:0016491; F:GO:0043167,C:mitochondrion; P:response to stress; F:oxidoreductase activity; F:ion binding,EC:1.15.1.1,Superoxide dismutase,IPR019832 (PFAM); IPR036314 (G3DSA:2.40.500.GENE3D); PTHR11404 (PANTHER); PTHR11404:SF6 (PANTHER); IPR036314 (SUPERFAMILY),F:GO:0004784; P:GO:0006801; F:GO:0046872; P:GO:0055114,F:superoxide dismutase activity; P:superoxide metabolic process; F:metal ion binding; P:oxidation-reduction process
,R7128,R,5,64.8,"INTERPRO, BLASTED, MAPPED, GO-SLIM",60S ribosomal protein L35a-1,20,3.8767E-07,100,3,F:GO:0003735; C:GO:0005840; P:GO:0006412,F:structural constituent of ribosome; C:ribosome; P:translation,,,no IPS match,no IPS match,no IPS match
,R7134,R,5,64.8,"INTERPRO, NO-BLAST",---NA---,,,,,,,,,no IPS match,no IPS match,no IPS match
abovelip-1,RI682,R,5,72.0,"INTERPRO, BLASTED, MAPPED, GO-SLIM",sm-like protein LSM7,20,2.92645E-25,100,3,C:GO:0005575; P:GO:0006397; P:GO:0034655,C:cellular_component; P:mRNA processing; P:nucleobase-containing compound catabolic process,,,no IPS match,no IPS match,no IPS match
,RI681,R,5,72.4,"INTERPRO, BLASTED, MAPPED, GO-SLIM",sm-like protein LSM7,20,1.20969E-19,99.2,5,F:GO:0003723; C:GO:0005634; P:GO:0006397; C:GO:0032991; P:GO:0034655,F:RNA binding; C:nucleus; P:mRNA processing; C:protein-containing complex; P:nucleobase-containing compound catabolic process,,,no IPS match,no IPS match,no IPS match
,D149572,D,5,74.9,"INTERPRO, BLASTED",probable plastid-lipid-associated protein 11,20,4.23435E-15,96.6,,,,,,no IPS match,no IPS match,no IPS match
,R9146,R,5,77.3,"INTERPRO, BLASTED, MAPPED, GO-SLIM",vestitone reductase-like,20,1.06476E-21,81.13,1,F:GO:0003674,F:molecular_function,,,no IPS match,no IPS match,no IPS match
,R6745,R,5,79.6,"INTERPRO, NO-BLAST",---NA---,,,,,,,,,no IPS match,no IPS match,no IPS match
"periotuk -1, openness-2",D353206,D,5,113.4,"INTERPRO, NO-BLAST",---NA---,,,,,,,,,no IPS match,no IPS match,no IPS match
,RI1321,R,6,0.0,"INTERPRO, BLASTED, MAPPED, GO-SLIM",KH domain-containing protein,20,3.6116E-23,97.87,2,F:GO:0003723; C:GO:0005575,F:RNA binding; C:cellular_component,,,IPR036612 (G3DSA:3.30.1370.GENE3D); PTHR11208 (PANTHER); PTHR11208:SF42 (PANTHER),F:GO:0003723,F:RNA binding
,R2992,R,6,7.2,"INTERPRO, BLASTED, MAPPED, GO-SLIM",cinnamoyl-CoA reductase 1,20,3.99755E-18,91.11,2,F:GO:0003674; C:GO:0005829,F:molecular_function; C:cytosol,,,no IPS match,no IPS match,no IPS match
,R2994,R,6,8.2,"INTERPRO, BLASTED, MAPPED, GO-SLIM",cinnamoyl-CoA reductase 1-like,20,2.60938E-16,88.12,1,F:GO:0003674,F:molecular_function,,,no IPS match,no IPS match,no IPS match
,R2999,R,6,9.3,"INTERPRO, BLASTED, MAPPED, GO-SLIM",cinnamoyl-CoA reductase 1,20,1.24203E-19,84.64,1,F:GO:0016491,F:oxidoreductase activity,EC:1.2.1.44,Cinnamoyl-CoA reductase,no IPS match,no IPS match,no IPS match
,R1489,R,6,37.0,"INTERPRO, BLASTED, MAPPED, GO-SLIM",actin,20,5.12138E-28,100,2,C:GO:0005575; F:GO:0043167,C:cellular_component; F:ion binding,,,no IPS match,no IPS match,no IPS match
,RI639,R,6,52.2,"INTERPRO, BLASTED, MAPPED, GO-SLIM",actin-depolymerizing factor 2,20,8.28043E-09,100,3,C:GO:0005856; P:GO:0007010; F:GO:0008092,C:cytoskeleton; P:cytoskeleton organization; F:cytoskeletal protein binding,,,no IPS match,no IPS match,no IPS match
,R6485,R,6,58.6,"INTERPRO, NO-BLAST",---NA---,,,,,,,,,mobidb-lite (MOBIDB_LITE),no GO terms,no GO terms
,D143707,D,6,67.9,"INTERPRO, NO-BLAST",---NA---,,,,,,,,,no IPS match,no IPS match,no IPS match
,R5504,R,6,75.4,"INTERPRO, NO-BLAST",---NA---,,,,,,,,,no IPS match,no IPS match,no IPS match
,R1201,R,6,79.5,"INTERPRO, BLASTED, MAPPED, GO-SLIM",COP9 signalosome complex subunit 2,20,1.3991E-25,100,1,C:GO:0005575,C:cellular_component,,,no IPS match,no IPS match,no IPS match
,R3741,R,6,81.9,"INTERPRO, NO-BLAST",---NA---,,,,,,,,,mobidb-lite (MOBIDB_LITE),no GO terms,no GO terms
,R3742,R,6,81.9,"INTERPRO, BLASTED, MAPPED, GO-SLIM",UBP1-associated protein 2A-like,20,1.42923E-08,76.22,2,F:GO:0003723; C:GO:0005575,F:RNA binding; C:cellular_component,,,no IPS match,no IPS match,no IPS match
,D180187,D,6,83.8,"INTERPRO, NO-BLAST",---NA---,,,,,,,,,no IPS match,no IPS match,no IPS match
,D340669,D,6,84.6,"INTERPRO, NO-BLAST",---NA---,,,,,,,,,no IPS match,no IPS match,no IPS match
,D355552,D,6,85.4,"INTERPRO, BLASTED, MAPPED, GO-SLIM",pentatricopeptide repeat-containing protein At2g27610,20,5.66423E-22,85.73,5,F:GO:0003723; F:GO:0004518; C:GO:0005622; F:GO:0043167; C:GO:0043226,F:RNA binding; F:nuclease activity; C:intracellular; F:ion binding; C:organelle,,,no IPS match,no IPS match,no IPS match
,D392706,D,6,86.1,"INTERPRO, NO-BLAST",---NA---,,,,,,,,,no IPS match,no IPS match,no IPS match
,R4844,R,6,91.3,"INTERPRO, BLASTED, MAPPED, GO-SLIM",probable glutathione S-transferase,20,1.99509E-20,84.51,7,C:GO:0005737; P:GO:0006790; P:GO:0009056; F:GO:0016765; P:GO:0019748; P:GO:0034641; P:GO:0051186,"C:cytoplasm; P:sulfur compound metabolic process; P:catabolic process; F:transferase activity, transferring alkyl or aryl (other than methyl) groups; P:secondary metabolic process; P:cellular nitrogen compound metabolic process; P:cofactor metabolic process",EC:2.5.1.18,Glutathione transferase,PF13410 (PFAM); G3DSA:1.20.1050.10 (GENE3D); PTHR11260:SF479 (PANTHER); PTHR11260 (PANTHER); IPR036282 (SUPERFAMILY),no GO terms,no GO terms
,D204701,D,7,0.0,"INTERPRO, NO-BLAST",---NA---,,,,,,,,,no IPS match,no IPS match,no IPS match
,D210515,D,7,0.3,"INTERPRO, NO-BLAST",---NA---,,,,,,,,,no IPS match,no IPS match,no IPS match
,R4686,R,7,13.0,"INTERPRO, BLASTED, MAPPED, GO-SLIM",galactinol synthase 1,20,6.17501E-26,96.79,3,P:GO:0005975; F:GO:0016757; P:GO:0044281,"P:carbohydrate metabolic process; F:transferase activity, transferring glycosyl groups; P:small molecule metabolic process",EC:2.4.1.123,Inositol 3-alpha-galactosyltransferase,no IPS match,no IPS match,no IPS match
,D494051,D,7,25.8,"INTERPRO, NO-BLAST",---NA---,,,,,,,,,no IPS match,no IPS match,no IPS match
,D189952,D,7,28.0,"INTERPRO, NO-BLAST",---NA---,,,,,,,,,no IPS match,no IPS match,no IPS match
,D24764,D,7,28.7,"INTERPRO, NO-BLAST",---NA---,,,,,,,,,no IPS match,no IPS match,no IPS match
,D110863,D,7,34.6,"INTERPRO, NO-BLAST",---NA---,,,,,,,,,no IPS match,no IPS match,no IPS match
,R688,R,7,36.4,"INTERPRO, BLASTED, MAPPED, GO-SLIM",Proteasome assembly chaperone like,20,4.69183E-21,89.38,2,C:GO:0005783; P:GO:0065003,C:endoplasmic reticulum; P:protein-containing complex assembly,,,mobidb-lite (MOBIDB_LITE),no GO terms,no GO terms
,R687,R,7,38.7,"INTERPRO, BLASTED, MAPPED, GO-SLIM",Proteasome assembly chaperone like,20,2.59565E-17,84.73,5,P:GO:0006950; P:GO:0009056; F:GO:0016491; F:GO:0043167; P:GO:0051186,P:response to stress; P:catabolic process; F:oxidoreductase activity; F:ion binding; P:cofactor metabolic process,EC:1.11.1.7,Peroxidase,PTHR37227 (PANTHER),no GO terms,no GO terms
,R1713,R,7,42.3,"INTERPRO, NO-BLAST",---NA---,,,,,,,,,no IPS match,no IPS match,no IPS match
,R3313,R,7,57.4,"INTERPRO, NO-BLAST",---NA---,,,,,,,,,mobidb-lite (MOBIDB_LITE),no GO terms,no GO terms
,R3314,R,7,62.8,"INTERPRO, NO-BLAST",---NA---,,,,,,,,,no IPS match,no IPS match,no IPS match
fenestra-12,RI1018,R,7,70.5,"INTERPRO, BLASTED, MAPPED, GO-SLIM","protein FATTY ACID EXPORT 2, chloroplastic",20,2.60441E-15,82.98,1,C:GO:0005575,C:cellular_component,,,no IPS match,no IPS match,no IPS match
,R1729,R,7,72.1,"INTERPRO, NO-BLAST",---NA---,,,,,,,,,no IPS match,no IPS match,no IPS match
,R6673,R,7,74.4,"INTERPRO, BLASTED, MAPPED, GO-SLIM","protein FATTY ACID EXPORT 2, chloroplastic",20,1.45566E-16,85.11,1,C:GO:0005575,C:cellular_component,,,IPR005349 (PANTHER); PTHR12668:SF5 (PANTHER),C:GO:0016020,C:membrane
,R6994,R,7,78.5,"INTERPRO, NO-BLAST",---NA---,,,,,,,,,no IPS match,no IPS match,no IPS match
,R6996,R,7,80.2,"INTERPRO, NO-BLAST",---NA---,,,,,,,,,no IPS match,no IPS match,no IPS match
,R6056,R,7,83.7,"INTERPRO, NO-BLAST",---NA---,,,,,,,,,no IPS match,no IPS match,no IPS match
,R4648,R,7,91.8,"INTERPRO, NO-BLAST",---NA---,,,,,,,,,no IPS match,no IPS match,no IPS match
,R3272,R,7,92.5,"INTERPRO, NO-BLAST",---NA---,,,,,,,,,no IPS match,no IPS match,no IPS match
,R3273,R,7,93.3,"INTERPRO, NO-BLAST",---NA---,,,,,,,,,no IPS match,no IPS match,no IPS match
,R7818,R,7,98.6,"INTERPRO, BLASTED, MAPPED, GO-SLIM",malate dehydrogenase,20,3.08333E-26,97.77,9,C:GO:0005576; C:GO:0005829; C:GO:0005886; P:GO:0005975; P:GO:0006091; F:GO:0016491; P:GO:0034641; P:GO:0044281; P:GO:0051186,C:extracellular region; C:cytosol; C:plasma membrane; P:carbohydrate metabolic process; P:generation of precursor metabolites and energy; F:oxidoreductase activity; P:cellular nitrogen compound metabolic process; P:small molecule metabolic process; P:cofactor metabolic process,EC:1.1.1.37,Malate dehydrogenase,IPR022383 (PFAM); IPR015955 (G3DSA:3.90.110.GENE3D); PTHR23382:SF5 (PANTHER); IPR010945 (PANTHER); IPR015955 (SUPERFAMILY),F:GO:0003824; P:GO:0005975; P:GO:0006108; F:GO:0016615; F:GO:0016616; P:GO:0055114,"F:catalytic activity; P:carbohydrate metabolic process; P:malate metabolic process; F:malate dehydrogenase activity; F:oxidoreductase activity, acting on the CH-OH group of donors, NAD or NADP as acceptor; P:oxidation-reduction process"
,R5438,R,7,104.3,"INTERPRO, BLASTED, MAPPED, GO-SLIM",FRIGIDA-like protein 4a,20,8.35894E-20,94.26,3,P:GO:0000003; P:GO:0030154; P:GO:0048856,P:reproduction; P:cell differentiation; P:anatomical structure development,,,no IPS match,no IPS match,no IPS match
ptnwindw-1,R1768,R,8,0.0,"INTERPRO, NO-BLAST",---NA---,,,,,,,,,no IPS match,no IPS match,no IPS match
fenestra-14,D45428,D,8,6.1,"INTERPRO, BLASTED, MAPPED, GO-SLIM",transcription termination/antitermination protein nusg,20,2.51334E-10,83.1,4,C:GO:0000229; P:GO:0009058; C:GO:0009536; P:GO:0034641,C:cytoplasmic chromosome; P:biosynthetic process; C:plastid; P:cellular nitrogen compound metabolic process,,,no IPS match,no IPS match,no IPS match
leafcolr-1,D325443,D,8,17.2,"INTERPRO, NO-BLAST",---NA---,,,,,,,,,no IPS match,no IPS match,no IPS match
,D6826,D,8,32.8,"INTERPRO, NO-BLAST",---NA---,,,,,,,,,no IPS match,no IPS match,no IPS match
,D55734,D,8,33.8,"INTERPRO, BLASTED, MAPPED, GO-SLIM",protein PHOSPHATE STARVATION RESPONSE 2-like isoform X1,20,1.12854E-09,98.14,4,F:GO:0003677; C:GO:0005634; P:GO:0009058; P:GO:0034641,F:DNA binding; C:nucleus; P:biosynthetic process; P:cellular nitrogen compound metabolic process,,,no IPS match,no IPS match,no IPS match
,D78486,D,8,34.7,"INTERPRO, NO-BLAST",---NA---,,,,,,,,,no IPS match,no IPS match,no IPS match
,R7201,R,8,36.4,"INTERPRO, BLASTED, MAPPED, GO-SLIM",dnaJ protein homolog,20,4.86744E-26,99.89,4,P:GO:0006457; P:GO:0006950; F:GO:0043167; F:GO:0051082,P:protein folding; P:response to stress; F:ion binding; F:unfolded protein binding,,,PTHR43888 (PANTHER); PTHR43888:SF15 (PANTHER),no GO terms,no GO terms
,R4563,R,8,38.0,"INTERPRO, NO-BLAST",---NA---,,,,,,,,,no IPS match,no IPS match,no IPS match
,R7197,R,8,41.3,"INTERPRO, BLASTED, MAPPED",dnaJ protein homolog,20,0.000147462,95.26,6,F:GO:0005524; P:GO:0006457; P:GO:0009408; F:GO:0031072; F:GO:0046872; F:GO:0051082,F:ATP binding; P:protein folding; P:response to heat; F:heat shock protein binding; F:metal ion binding; F:unfolded protein binding,,,no IPS match,no IPS match,no IPS match
,RI1157,R,8,42.4,"INTERPRO, NO-BLAST",---NA---,,,,,,,,,no IPS match,no IPS match,no IPS match
,R7206,R,8,43.5,"INTERPRO, NO-BLAST",---NA---,,,,,,,,,mobidb-lite (MOBIDB_LITE),no GO terms,no GO terms
,R7202,R,8,46.1,"INTERPRO, BLASTED, MAPPED, GO-SLIM",dnaJ protein homolog,20,4.8677E-26,99.89,4,P:GO:0006457; P:GO:0006950; F:GO:0043167; F:GO:0051082,P:protein folding; P:response to stress; F:ion binding; F:unfolded protein binding,,,PTHR43888 (PANTHER); PTHR43888:SF15 (PANTHER),no GO terms,no GO terms
,RI165,R,8,46.1,"INTERPRO, NO-BLAST",---NA---,,,,,,,,,no IPS match,no IPS match,no IPS match
,RI164,R,8,46.6,"INTERPRO, NO-BLAST",---NA---,,,,,,,,,no IPS match,no IPS match,no IPS match
,R1101,R,8,49.0,"INTERPRO, BLASTED, MAPPED",60S ribosomal protein L13-1-like,20,5.59969E-06,97.5,4,F:GO:0003735; C:GO:0005622; C:GO:0005840; P:GO:0006412,F:structural constituent of ribosome; C:intracellular; C:ribosome; P:translation,,,no IPS match,no IPS match,no IPS match
,R1100,R,8,49.0,"INTERPRO, NO-BLAST",---NA---,,,,,,,,,no IPS match,no IPS match,no IPS match
,R2536,R,8,49.5,"INTERPRO, BLASTED, MAPPED, GO-SLIM",exocyst complex component EXO70A1-like,20,2.57506E-26,98.94,13,P:GO:0000003; P:GO:0000278; P:GO:0000902; C:GO:0005615; C:GO:0005634; C:GO:0005829; C:GO:0005886; P:GO:0009058; P:GO:0016192; P:GO:0022607; C:GO:0032991; P:GO:0040007; P:GO:0051301,P:reproduction; P:mitotic cell cycle; P:cell morphogenesis; C:extracellular space; C:nucleus; C:cytosol; C:plasma membrane; P:biosynthetic process; P:vesicle-mediated transport; P:cellular component assembly; C:protein-containing complex; P:growth; P:cell division,,,IPR004140 (PFAM); G3DSA:1.20.1280.170 (GENE3D); PTHR12542:SF41 (PANTHER); IPR004140 (PANTHER); IPR016159 (SUPERFAMILY),C:GO:0000145; P:GO:0006887,C:exocyst; P:exocytosis
,R2304,R,8,54.2,"INTERPRO, BLASTED, MAPPED, GO-SLIM",nucleolar protein 56-like,20,9.42214E-29,96.28,5,F:GO:0003723; C:GO:0005730; C:GO:0032991; P:GO:0034641; P:GO:0042254,F:RNA binding; C:nucleolus; C:protein-containing complex; P:cellular nitrogen compound metabolic process; P:ribosome biogenesis,,,no IPS match,no IPS match,no IPS match
,RI262,R,8,55.8,"INTERPRO, BLASTED, MAPPED, GO-SLIM",nucleolar protein 56-like,20,1.80525E-10,98.19,5,F:GO:0003723; C:GO:0005730; C:GO:0032991; P:GO:0034641; P:GO:0042254,F:RNA binding; C:nucleolus; C:protein-containing complex; P:cellular nitrogen compound metabolic process; P:ribosome biogenesis,,,no IPS match,no IPS match,no IPS match
,R1501,R,8,59.6,"INTERPRO, BLASTED, MAPPED, GO-SLIM","peptidyl-prolyl cis-trans isomerase FKBP16-4, chloroplastic",20,1.32995E-24,99.89,4,P:GO:0006464; C:GO:0009536; C:GO:0009579; F:GO:0016853,P:cellular protein modification process; C:plastid; C:thylakoid; F:isomerase activity,EC:5.2.1.8,Peptidylprolyl isomerase,IPR001179 (PFAM); G3DSA:3.10.50.40 (GENE3D); IPR023566 (PANTHER); PTHR10516:SF319 (PANTHER); IPR001179 (PROSITE_PROFILES); SSF54534 (SUPERFAMILY),no GO terms,no GO terms
,R6935,R,8,66.0,"INTERPRO, BLASTED, MAPPED, GO-SLIM","bifunctional L-3-cyanoalanine synthase/cysteine synthase 1, mitochondrial",20,1.51475E-25,96.81,7,C:GO:0005739; P:GO:0006520; P:GO:0006790; P:GO:0009058; F:GO:0016765; F:GO:0016829; P:GO:0034641,"C:mitochondrion; P:cellular amino acid metabolic process; P:sulfur compound metabolic process; P:biosynthetic process; F:transferase activity, transferring alkyl or aryl (other than methyl) groups; F:lyase activity; P:cellular nitrogen compound metabolic process",EC:4.4.1.9; EC:2.5.1.47,L-3-cyanoalanine synthase; Cysteine synthase,no IPS match,no IPS match,no IPS match
,RI428,R,8,68.7,"INTERPRO, BLASTED, MAPPED, GO-SLIM","bifunctional L-3-cyanoalanine synthase/cysteine synthase 1, mitochondrial",20,1.63128E-10,70.84,8,C:GO:0005739; P:GO:0006520; P:GO:0006790; P:GO:0009058; F:GO:0016765; F:GO:0016829; P:GO:0034641; F:GO:0043167,"C:mitochondrion; P:cellular amino acid metabolic process; P:sulfur compound metabolic process; P:biosynthetic process; F:transferase activity, transferring alkyl or aryl (other than methyl) groups; F:lyase activity; P:cellular nitrogen compound metabolic process; F:ion binding",EC:4.4.1.9; EC:2.5.1.47,L-3-cyanoalanine synthase; Cysteine synthase,mobidb-lite (MOBIDB_LITE),no GO terms,no GO terms
,R2005,R,8,71.7,"INTERPRO, NO-BLAST",---NA---,,,,,,,,,no IPS match,no IPS match,no IPS match
,R2841,R,8,76.5,"INTERPRO, NO-BLAST",---NA---,,,,,,,,,no IPS match,no IPS match,no IPS match
smoothzn-8,R2844,R,8,79.7,"INTERPRO, BLASTED, MAPPED","ATP synthase subunit O, mitochondrial-like",20,0.000111044,98.75,11,C:GO:0005739; C:GO:0005753; C:GO:0005886; F:GO:0008270; C:GO:0009507; P:GO:0015986; C:GO:0016020; F:GO:0016787; F:GO:0046933; F:GO:0050897; P:GO:0099132,"C:mitochondrion; C:mitochondrial proton-transporting ATP synthase complex; C:plasma membrane; F:zinc ion binding; C:chloroplast; P:ATP synthesis coupled proton transport; C:membrane; F:hydrolase activity; F:proton-transporting ATP synthase activity, rotational mechanism; F:cobalt ion binding; P:ATP hydrolysis coupled cation transmembrane transport",,,no IPS match,no IPS match,no IPS match
,R16,R,8,97.0,"INTERPRO, NO-BLAST",---NA---,,,,,,,,,no IPS match,no IPS match,no IPS match
,R9330,R,9,0.0,"INTERPRO, NO-BLAST",---NA---,,,,,,,,,no IPS match,no IPS match,no IPS match
,R5395,R,9,2.7,"INTERPRO, NO-BLAST",---NA---,,,,,,,,,no IPS match,no IPS match,no IPS match
,R5400,R,9,3.9,"INTERPRO, BLASTED, MAPPED, GO-SLIM",probable fructokinase-4,20,1.39259E-11,89.63,6,C:GO:0005829; P:GO:0005975; P:GO:0009058; F:GO:0016301; F:GO:0043167; P:GO:0044281,C:cytosol; P:carbohydrate metabolic process; P:biosynthetic process; F:kinase activity; F:ion binding; P:small molecule metabolic process,EC:2.7.1.4; EC:2.7.1.1,Fructokinase; Hexokinase,no IPS match,no IPS match,no IPS match
,R5398,R,9,4.3,"INTERPRO, BLASTED, MAPPED, GO-SLIM",probable fructokinase-4,20,1.39259E-11,89.63,6,C:GO:0005829; P:GO:0005975; P:GO:0009058; F:GO:0016301; F:GO:0043167; P:GO:0044281,C:cytosol; P:carbohydrate metabolic process; P:biosynthetic process; F:kinase activity; F:ion binding; P:small molecule metabolic process,EC:2.7.1.4; EC:2.7.1.1,Fructokinase; Hexokinase,no IPS match,no IPS match,no IPS match
,R5401,R,9,4.9,"INTERPRO, NO-BLAST",---NA---,,,,,,,,,no IPS match,no IPS match,no IPS match
,R5394,R,9,5.5,"INTERPRO, BLASTED, MAPPED, GO-SLIM",probable fructokinase-4,20,1.39259E-11,89.63,6,C:GO:0005829; P:GO:0005975; P:GO:0009058; F:GO:0016301; F:GO:0043167; P:GO:0044281,C:cytosol; P:carbohydrate metabolic process; P:biosynthetic process; F:kinase activity; F:ion binding; P:small molecule metabolic process,EC:2.7.1.4; EC:2.7.1.1,Fructokinase; Hexokinase,no IPS match,no IPS match,no IPS match
,R7466,R,9,6.9,"INTERPRO, BLASTED, MAPPED, GO-SLIM",60S ribosomal protein L9,20,2.21739E-07,99.37,4,F:GO:0003735; C:GO:0005840; P:GO:0006412; F:GO:0019843,F:structural constituent of ribosome; C:ribosome; P:translation; F:rRNA binding,,,no IPS match,no IPS match,no IPS match
,R7465,R,9,8.5,"INTERPRO, NO-BLAST",---NA---,,,,,,,,,no IPS match,no IPS match,no IPS match
,R1763,R,9,14.1,"INTERPRO, NO-BLAST",---NA---,,,,,,,,,no IPS match,no IPS match,no IPS match
numpitch-8,RI1092,R,9,20.6,"INTERPRO, BLASTED, MAPPED, GO-SLIM",Pirin-like protein,20,6.01786E-20,96.73,1,C:GO:0005575,C:cellular_component,,,no IPS match,no IPS match,no IPS match
,RI876,R,9,33.5,"INTERPRO, BLASTED, MAPPED",PREDICTED: uncharacterized protein LOC105964639 [Erythranthe guttata],20,6.49493E-06,100,2,C:GO:0016020; C:GO:0016021,C:membrane; C:integral component of membrane,,,no IPS match,no IPS match,no IPS match
,R3421,R,9,37.5,"INTERPRO, NO-BLAST",---NA---,,,,,,,,,no IPS match,no IPS match,no IPS match
,R3420,R,9,38.0,"INTERPRO, NO-BLAST",---NA---,,,,,,,,,no IPS match,no IPS match,no IPS match
,D182962,D,9,41.8,"INTERPRO, BLASTED, MAPPED, GO-SLIM",protein SULFUR DEFICIENCY-INDUCED 2,20,1.43979E-11,83.46,1,F:GO:0003674,F:molecular_function,,,mobidb-lite (MOBIDB_LITE),no GO terms,no GO terms
,R1643,R,9,57.8,"INTERPRO, NO-BLAST",---NA---,,,,,,,,,no IPS match,no IPS match,no IPS match
,D362694,D,9,60.5,"INTERPRO, NO-BLAST",---NA---,,,,,,,,,no IPS match,no IPS match,no IPS match
,R1642,R,9,62.7,"INTERPRO, NO-BLAST",---NA---,,,,,,,,,no IPS match,no IPS match,no IPS match
,D89384,D,9,66.5,"INTERPRO, BLASTED, MAPPED",protein TIME FOR COFFEE,20,2.29808E-06,85.15,7,C:GO:0005634; P:GO:0005982; P:GO:0006979; P:GO:0009414; P:GO:0009737; P:GO:0032502; P:GO:0042752,C:nucleus; P:starch metabolic process; P:response to oxidative stress; P:response to water deprivation; P:response to abscisic acid; P:developmental process; P:regulation of circadian rhythm,,,no IPS match,no IPS match,no IPS match
,D368289,D,9,67.1,"INTERPRO, BLASTED, MAPPED",protein TIME FOR COFFEE isoform X1,20,3.82118E-07,87.88,7,C:GO:0005634; P:GO:0005982; P:GO:0006979; P:GO:0009414; P:GO:0009737; P:GO:0032502; P:GO:0042752,C:nucleus; P:starch metabolic process; P:response to oxidative stress; P:response to water deprivation; P:response to abscisic acid; P:developmental process; P:regulation of circadian rhythm,,,no IPS match,no IPS match,no IPS match
,RI37,R,9,67.6,"INTERPRO, BLASTED, MAPPED, GO-SLIM",peptide methionine sulfoxide reductase B5-like,20,6.19102E-20,92.38,2,P:GO:0006950; F:GO:0016491,P:response to stress; F:oxidoreductase activity,EC:1.8.4.12,Peptide-methionine (R)-S-oxide reductase,no IPS match,no IPS match,no IPS match
,R1641,R,9,67.6,"INTERPRO, NO-BLAST",---NA---,,,,,,,,,no IPS match,no IPS match,no IPS match
,R2442,R,9,69.9,"INTERPRO, NO-BLAST",---NA---,,,,,,,,,no IPS match,no IPS match,no IPS match
,R1511,R,9,72.1,"INTERPRO, NO-BLAST",---NA---,,,,,,,,,no IPS match,no IPS match,no IPS match
,R2437,R,9,74.8,"INTERPRO, BLASTED, MAPPED, GO-SLIM","1,2-dihydroxy-3-keto-5-methylthiopentene dioxygenase 2",20,3.25755E-19,88.8,7,C:GO:0005634; C:GO:0005737; P:GO:0006520; P:GO:0006790; P:GO:0009058; F:GO:0016491; F:GO:0043167,C:nucleus; C:cytoplasm; P:cellular amino acid metabolic process; P:sulfur compound metabolic process; P:biosynthetic process; F:oxidoreductase activity; F:ion binding,EC:1.13.11; EC:1.13.11.54,Acting on single donors with incorporation of molecular oxygen (oxygenases). The oxygen incorporated need not be derived from O(2); Acireductone dioxygenase (Fe(2+)-requiring),IPR014710 (G3DSA:2.60.120.GENE3D),no GO terms,no GO terms
,R728,R,9,85.5,"INTERPRO, BLASTED, MAPPED, GO-SLIM","20 kDa chaperonin, chloroplastic-like",20,2.04587E-20,93.72,6,C:GO:0005739; P:GO:0006457; P:GO:0006950; C:GO:0009536; F:GO:0043167; F:GO:0051082,C:mitochondrion; P:protein folding; P:response to stress; C:plastid; F:ion binding; F:unfolded protein binding,EC:1.97.1,Other oxidoreductases,no IPS match,no IPS match,no IPS match
,R8070,R,10,0.0,"INTERPRO, NO-BLAST",---NA---,,,,,,,,,no IPS match,no IPS match,no IPS match
,RI693,R,10,2.4,"INTERPRO, BLASTED, MAPPED, GO-SLIM",Hepatocellular carcinoma-associated antigen 59 protein,20,1.81398E-20,95.04,4,F:GO:0003674; C:GO:0005654; P:GO:0006464; P:GO:0048856,F:molecular_function; C:nucleoplasm; P:cellular protein modification process; P:anatomical structure development,,,no IPS match,no IPS match,no IPS match
,R5845,R,10,5.6,"INTERPRO, NO-BLAST",---NA---,,,,,,,,,no IPS match,no IPS match,no IPS match
,R5847,R,10,5.6,"INTERPRO, NO-BLAST",---NA---,,,,,,,,,no IPS match,no IPS match,no IPS match
,R6600,R,10,8.5,"INTERPRO, NO-BLAST",---NA---,,,,,,,,,no IPS match,no IPS match,no IPS match
,R6611,R,10,9.9,"INTERPRO, NO-BLAST",---NA---,,,,,,,,,no IPS match,no IPS match,no IPS match
,R6612,R,10,9.9,"INTERPRO, NO-BLAST",---NA---,,,,,,,,,no IPS match,no IPS match,no IPS match
,D174220,D,10,17.4,"INTERPRO, NO-BLAST",---NA---,,,,,,,,,no IPS match,no IPS match,no IPS match
,R4041,R,10,23.1,"INTERPRO, NO-BLAST",---NA---,,,,,,,,,no IPS match,no IPS match,no IPS match
,R4038,R,10,25.0,"INTERPRO, NO-BLAST",---NA---,,,,,,,,,no IPS match,no IPS match,no IPS match
,R5896,R,10,33.0,"INTERPRO, NO-BLAST",---NA---,,,,,,,,,no IPS match,no IPS match,no IPS match
,R8368,R,10,41.4,"INTERPRO, BLASTED, MAPPED, GO-SLIM",sm-like protein LSM2,20,5.24208E-19,100,5,F:GO:0003723; C:GO:0005634; C:GO:0005737; P:GO:0006397; C:GO:0032991,F:RNA binding; C:nucleus; C:cytoplasm; P:mRNA processing; C:protein-containing complex,,,no IPS match,no IPS match,no IPS match
,R2502,R,10,51.2,"INTERPRO, NO-BLAST",---NA---,,,,,,,,,no IPS match,no IPS match,no IPS match
,R8431,R,10,58.3,"INTERPRO, BLASTED, MAPPED, GO-SLIM",serine/threonine-protein phosphatase 4 regulatory subunit 2 isoform X1,20,1.64635E-15,96.64,4,C:GO:0005622; P:GO:0006464; F:GO:0030234; C:GO:0032991,C:intracellular; P:cellular protein modification process; F:enzyme regulator activity; C:protein-containing complex,,,PTHR16487:SF0 (PANTHER); IPR015267 (PANTHER),F:GO:0019888; C:GO:0030289,F:protein phosphatase regulator activity; C:protein phosphatase 4 complex
,R8429,R,10,67.5,"INTERPRO, BLASTED, MAPPED, GO-SLIM",serine/threonine-protein phosphatase 4 regulatory subunit 2-like isoform X1,20,9.85452E-13,93.18,4,C:GO:0005622; P:GO:0006464; F:GO:0030234; C:GO:0032991,C:intracellular; P:cellular protein modification process; F:enzyme regulator activity; C:protein-containing complex,,,mobidb-lite (MOBIDB_LITE),no GO terms,no GO terms
,R7876,R,10,85.2,"INTERPRO, NO-BLAST",---NA---,,,,,,,,,no IPS match,no IPS match,no IPS match
,R8052,R,11,0.0,"INTERPRO, NO-BLAST",---NA---,,,,,,,,,no IPS match,no IPS match,no IPS match
,R7691,R,11,7.7,"INTERPRO, NO-BLAST",---NA---,,,,,,,,,no IPS match,no IPS match,no IPS match
,R1618,R,11,18.4,"INTERPRO, BLASTED, MAPPED, GO-SLIM",aquaporin PIP1-3-like,20,7.17695E-26,99.68,2,C:GO:0005575; F:GO:0022857,C:cellular_component; F:transmembrane transporter activity,,,no IPS match,no IPS match,no IPS match
,R5566,R,11,34.4,"INTERPRO, BLASTED",serine-rich adhesin for platelets isoform X1,20,3.65334E-10,73.51,,,,,,no IPS match,no IPS match,no IPS match
,D451939,D,11,39.8,"INTERPRO, NO-BLAST",---NA---,,,,,,,,,no IPS match,no IPS match,no IPS match
smoothzn-3,R5369,R,11,52.2,"INTERPRO, NO-BLAST",---NA---,,,,,,,,,no IPS match,no IPS match,no IPS match
widtleaf-1,D299124,D,11,66.3,"INTERPRO, BLASTED, MAPPED, GO-SLIM","probable ADP,ATP carrier protein At5g56450",20,8.20969E-19,89.46,4,P:GO:0000003; C:GO:0005739; F:GO:0022857; P:GO:0048856,P:reproduction; C:mitochondrion; F:transmembrane transporter activity; P:anatomical structure development,,,no IPS match,no IPS match,no IPS match
,D422205,D,11,67.8,"INTERPRO, BLASTED, MAPPED, GO-SLIM","probable ADP,ATP carrier protein At5g56450",20,6.14308E-22,92.55,6,P:GO:0000003; C:GO:0005739; P:GO:0007005; F:GO:0022857; P:GO:0048856; P:GO:0061024,P:reproduction; C:mitochondrion; P:mitochondrion organization; F:transmembrane transporter activity; P:anatomical structure development; P:membrane organization,,,no IPS match,no IPS match,no IPS match
,D494387,D,11,78.7,"INTERPRO, NO-BLAST",---NA---,,,,,,,,,no IPS match,no IPS match,no IPS match
,R2256,R,12,0.0,"INTERPRO, BLASTED, MAPPED, GO-SLIM",mitochondrial alternative oxidase,20,1.47357E-25,99.68,3,C:GO:0005575; F:GO:0016491; F:GO:0043167,C:cellular_component; F:oxidoreductase activity; F:ion binding,EC:1.10.3.11; EC:1.10.3,Ubiquinol oxidase (non-electrogenic); Acting on diphenols and related substances as donors,IPR038659 (G3DSA:1.20.1260.GENE3D); IPR002680 (PFAM); IPR002680 (PANTHER); PTHR31803:SF6 (PANTHER),F:GO:0009916; P:GO:0055114,F:alternative oxidase activity; P:oxidation-reduction process
,RI1344,R,12,13.6,"INTERPRO, NO-BLAST",---NA---,,,,,,,,,mobidb-lite (MOBIDB_LITE),no GO terms,no GO terms
,R2014,R,12,27.3,"INTERPRO, BLASTED, MAPPED, GO-SLIM",Cytochrome c,20,2.31587E-16,100,6,C:GO:0005739; P:GO:0006091; F:GO:0016491; P:GO:0034641; F:GO:0043167; P:GO:0044281,C:mitochondrion; P:generation of precursor metabolites and energy; F:oxidoreductase activity; P:cellular nitrogen compound metabolic process; F:ion binding; P:small molecule metabolic process,,,no IPS match,no IPS match,no IPS match
,R681,R,12,40.3,"INTERPRO, BLASTED, MAPPED, GO-SLIM",14-3-3-like protein,20,3.92925E-26,100,1,F:GO:0003674,F:molecular_function,,,IPR023410 (PFAM); IPR036815 (G3DSA:1.20.190.GENE3D); PTHR18860:SF26 (PANTHER); IPR000308 (PANTHER); IPR036815 (SUPERFAMILY),F:GO:0019904,F:protein domain specific binding
,R2498,R,12,44.8,"INTERPRO, BLASTED, MAPPED","heat shock 70 kDa protein, mitochondrial",3,0.000169489,79.43,4,F:GO:0000166; F:GO:0005524; P:GO:0006457; F:GO:0051082,F:nucleotide binding; F:ATP binding; P:protein folding; F:unfolded protein binding,,,mobidb-lite (MOBIDB_LITE),no GO terms,no GO terms
,R2499,R,12,45.6,"INTERPRO, NO-BLAST",---NA---,,,,,,,,,no IPS match,no IPS match,no IPS match
,R8386,R,12,46.5,"INTERPRO, NO-BLAST",---NA---,,,,,,,,,no IPS match,no IPS match,no IPS match
,RI661,R,12,54.2,"INTERPRO, BLASTED, MAPPED, GO-SLIM",somatic embryogenesis receptor kinase 2-like,20,2.28714E-25,95.32,4,C:GO:0005886; P:GO:0006464; P:GO:0007165; F:GO:0016301,C:plasma membrane; P:cellular protein modification process; P:signal transduction; F:kinase activity,EC:2.7.11,Transferring phosphorus-containing groups,no IPS match,no IPS match,no IPS match
,RI845,R,12,55.9,"INTERPRO, BLASTED",kynurenine formamidase isoform X1,4,3.1316E-07,66.42,,,,,,no IPS match,no IPS match,no IPS match
fenestra-10,R906,R,12,68.3,"INTERPRO, BLASTED, MAPPED, GO-SLIM","fructose-bisphosphate aldolase 1, chloroplastic",20,5.55583E-08,99,7,P:GO:0005975; P:GO:0006091; P:GO:0009058; F:GO:0016829; P:GO:0034655; P:GO:0044281; P:GO:0051186,P:carbohydrate metabolic process; P:generation of precursor metabolites and energy; P:biosynthetic process; F:lyase activity; P:nucleobase-containing compound catabolic process; P:small molecule metabolic process; P:cofactor metabolic process,EC:4.1.2.13,Fructose-bisphosphate aldolase,mobidb-lite (MOBIDB_LITE),no GO terms,no GO terms
,R145,R,12,71.5,"INTERPRO, BLASTED, MAPPED, GO-SLIM",eukaryotic translation initiation factor 4B3-like,20,1.23018E-20,93.07,2,F:GO:0008135; P:GO:0048856,"F:translation factor activity, RNA binding; P:anatomical structure development",,,no IPS match,no IPS match,no IPS match
,R6909,R,13,0.0,"INTERPRO, BLASTED, MAPPED, GO-SLIM",patatin-like protein 2,20,5.11319E-18,88.8,4,F:GO:0003674; C:GO:0005737; P:GO:0006629; P:GO:0009056,F:molecular_function; C:cytoplasm; P:lipid metabolic process; P:catabolic process,EC:3.1.1.23; EC:3.1.1.1,Acylglycerol lipase; Carboxylesterase,G3DSA:3.40.1090.10 (GENE3D),no GO terms,no GO terms
,RI1117,R,13,12.1,"INTERPRO, BLASTED, MAPPED, GO-SLIM",patatin-like protein 2,20,1.17023E-18,88.62,4,F:GO:0003674; C:GO:0005737; P:GO:0006629; P:GO:0009056,F:molecular_function; C:cytoplasm; P:lipid metabolic process; P:catabolic process,EC:3.1.1.23; EC:3.1.1.1,Acylglycerol lipase; Carboxylesterase,G3DSA:3.40.1090.10 (GENE3D); PTHR32176:SF7 (PANTHER); PTHR32176 (PANTHER),no GO terms,no GO terms
,R6904,R,13,14.9,"INTERPRO, BLASTED, MAPPED, GO-SLIM",patatin-like protein 2,20,2.80383E-13,86.44,4,F:GO:0003674; C:GO:0005737; P:GO:0006629; P:GO:0009056,F:molecular_function; C:cytoplasm; P:lipid metabolic process; P:catabolic process,EC:3.1.1.23; EC:3.1.1.1,Acylglycerol lipase; Carboxylesterase,no IPS match,no IPS match,no IPS match
,R6906,R,13,14.9,"INTERPRO, BLASTED, MAPPED, GO-SLIM",patatin-like protein 2,20,4.3382E-12,85.45,4,F:GO:0003674; C:GO:0005737; P:GO:0006629; P:GO:0009056,F:molecular_function; C:cytoplasm; P:lipid metabolic process; P:catabolic process,EC:3.1.1.23; EC:3.1.1.1,Acylglycerol lipase; Carboxylesterase,no IPS match,no IPS match,no IPS match
,R6911,R,13,17.0,"INTERPRO, BLASTED, MAPPED, GO-SLIM",patatin-like protein 2,20,3.07398E-18,86.52,3,F:GO:0003674; P:GO:0006629; P:GO:0009056,F:molecular_function; P:lipid metabolic process; P:catabolic process,,,no IPS match,no IPS match,no IPS match
,RI87,R,13,26.2,"INTERPRO, BLASTED, MAPPED, GO-SLIM",sugar transporter ERD6-like 6,20,1.71612E-18,96.02,3,C:GO:0005575; F:GO:0016491; F:GO:0022857,C:cellular_component; F:oxidoreductase activity; F:transmembrane transporter activity,EC:1.3.1.74,2-alkenal reductase (NAD(P)(+)),IPR003663 (PRINTS); G3DSA:1.20.1250.20 (GENE3D); IPR005828 (PFAM); PTHR23500 (PANTHER); PTHR23500:SF356 (PANTHER),C:GO:0016020; C:GO:0016021; F:GO:0022857; P:GO:0055085,C:membrane; C:integral component of membrane; F:transmembrane transporter activity; P:transmembrane transport
,RI1054,R,13,36.7,"INTERPRO, NO-BLAST",---NA---,,,,,,,,,no IPS match,no IPS match,no IPS match
,R2317,R,13,48.5,"INTERPRO, BLASTED, MAPPED, GO-SLIM",cyclin-dependent kinase F-4-like isoform X1,20,1.20612E-25,96.81,3,P:GO:0006464; F:GO:0016301; F:GO:0043167,P:cellular protein modification process; F:kinase activity; F:ion binding,EC:2.7.11,Transferring phosphorus-containing groups,G3DSA:1.10.510.10 (GENE3D); PTHR24055 (PANTHER); PTHR24055:SF336 (PANTHER); IPR011009 (SUPERFAMILY),no GO terms,no GO terms
fenestra-11,R7097,R,13,59.9,"INTERPRO, BLASTED, MAPPED, GO-SLIM",Cysteine protease,20,3.36265E-21,87.62,4,C:GO:0005615; C:GO:0005764; F:GO:0008233; P:GO:0009056,C:extracellular space; C:lysosome; F:peptidase activity; P:catabolic process,EC:3.4.22,Acting on peptide bonds (peptidases),no IPS match,no IPS match,no IPS match
,D85613,D,13,65.1,"INTERPRO, NO-BLAST",---NA---,,,,,,,,,no IPS match,no IPS match,no IPS match
,D337565,D,13,66.2,"INTERPRO, NO-BLAST",---NA---,,,,,,,,,no IPS match,no IPS match,no IPS match
,R8173,R,13,76.7,"INTERPRO, BLASTED, MAPPED, GO-SLIM","ATP-dependent zinc metalloprotease FTSH, chloroplastic",20,8.72473E-26,99.79,11,C:GO:0005739; P:GO:0006091; F:GO:0008233; P:GO:0009056; C:GO:0009536; C:GO:0009579; P:GO:0015979; F:GO:0016887; F:GO:0043167; P:GO:0061024; P:GO:0065003,C:mitochondrion; P:generation of precursor metabolites and energy; F:peptidase activity; P:catabolic process; C:plastid; C:thylakoid; P:photosynthesis; F:ATPase activity; F:ion binding; P:membrane organization; P:protein-containing complex assembly,EC:3.4.24; EC:3.6.1.3; EC:3.6.1.15,Acting on peptide bonds (peptidases); Adenosinetriphosphatase; Nucleoside-triphosphate phosphatase,IPR003959 (PFAM); G3DSA:3.40.50.300 (GENE3D); PTHR23076:SF33 (PANTHER); PTHR23076 (PANTHER); IPR027417 (SUPERFAMILY),F:GO:0005524,F:ATP binding
,R2023,R,14,0.0,"INTERPRO, BLASTED, MAPPED, GO-SLIM",GPN-loop GTPase 3,20,2.43728E-22,94.79,1,F:GO:0003924,F:GTPase activity,EC:3.6.1.15,Nucleoside-triphosphate phosphatase,no IPS match,no IPS match,no IPS match
,R6688,R,14,2.2,"INTERPRO, BLASTED, MAPPED, GO-SLIM",GPN-loop GTPase 3,20,1.39511E-22,94.79,1,F:GO:0003924,F:GTPase activity,EC:3.6.1.15,Nucleoside-triphosphate phosphatase,IPR004130 (PFAM),no GO terms,no GO terms
,R6123,R,14,5.1,"INTERPRO, BLASTED, MAPPED, GO-SLIM",cinnamate 4-hydroxylase,20,1.35735E-22,92.55,2,F:GO:0016491; F:GO:0043167,F:oxidoreductase activity; F:ion binding,EC:1.14.13; EC:1.14.13.11,"Acting on paired donors, with incorporation or reduction of molecular oxygen. The oxygen incorporated need not be derived from O(2); Trans-cinnamate 4-monooxygenase",PTHR24298:SF56 (PANTHER); PTHR24298 (PANTHER),no GO terms,no GO terms
,RI1393,R,14,11.4,"INTERPRO, NO-BLAST",---NA---,,,,,,,,,no IPS match,no IPS match,no IPS match
,RI1392,R,14,11.4,"INTERPRO, NO-BLAST",---NA---,,,,,,,,,mobidb-lite (MOBIDB_LITE),no GO terms,no GO terms
,RI459,R,14,20.2,"INTERPRO, BLASTED, MAPPED, GO-SLIM",putative histone H2B-like protein,20,2.83472E-26,100,4,F:GO:0003677; C:GO:0005634; C:GO:0005694; C:GO:0032991,F:DNA binding; C:nucleus; C:chromosome; C:protein-containing complex,,,no IPS match,no IPS match,no IPS match
,R1811,R,14,25.9,"INTERPRO, BLASTED, MAPPED, GO-SLIM","4-hydroxy-3-methylbut-2-en-1-yl diphosphate synthase (ferredoxin), chloroplastic",20,7.88823E-21,96.17,6,P:GO:0006629; P:GO:0009058; C:GO:0009536; F:GO:0016491; F:GO:0043167; P:GO:0044281,P:lipid metabolic process; P:biosynthetic process; C:plastid; F:oxidoreductase activity; F:ion binding; P:small molecule metabolic process,EC:1.17.7.1; EC:1.17.7,(E)-4-hydroxy-3-methylbut-2-enyl-diphosphate synthase (ferredoxin); Acting on CH or CH(2) groups,no IPS match,no IPS match,no IPS match
,R8151,R,14,29.1,"INTERPRO, NO-BLAST",---NA---,,,,,,,,,no IPS match,no IPS match,no IPS match
lengintr-2,R934,R,14,37.4,"INTERPRO, NO-BLAST",---NA---,,,,,,,,,no IPS match,no IPS match,no IPS match
,R4578,R,14,44.8,"INTERPRO, NO-BLAST",---NA---,,,,,,,,,no IPS match,no IPS match,no IPS match
,D260441,D,14,58.9,"INTERPRO, NO-BLAST",---NA---,,,,,,,,,no IPS match,no IPS match,no IPS match
,R1769,R,15,0.0,"INTERPRO, NO-BLAST",---NA---,,,,,,,,,no IPS match,no IPS match,no IPS match
,R6031,R,15,7.4,"INTERPRO, BLASTED, MAPPED, GO-SLIM",soluble inorganic pyrophosphatase 4,20,2.05774E-11,94,3,C:GO:0005829; P:GO:0008150; F:GO:0043167,C:cytosol; P:biological_process; F:ion binding,EC:3.6.1.1,Inorganic diphosphatase,mobidb-lite (MOBIDB_LITE),no GO terms,no GO terms
fenestra-3,R1048,R,15,12.5,"INTERPRO, BLASTED, MAPPED, GO-SLIM",AT3G02360-like protein,20,1.1508E-20,94.17,5,P:GO:0005975; F:GO:0016491; P:GO:0034641; P:GO:0044281; P:GO:0051186,P:carbohydrate metabolic process; F:oxidoreductase activity; P:cellular nitrogen compound metabolic process; P:small molecule metabolic process; P:cofactor metabolic process,EC:1.1.1.44,"Phosphogluconate dehydrogenase (NADP(+)-dependent, decarboxylating)",no IPS match,no IPS match,no IPS match
,R1042,R,15,14.4,"INTERPRO, BLASTED, MAPPED, GO-SLIM",phosphogluconate dehydrogenase,20,2.85308E-19,91.7,5,P:GO:0005975; F:GO:0016491; P:GO:0034641; P:GO:0044281; P:GO:0051186,P:carbohydrate metabolic process; F:oxidoreductase activity; P:cellular nitrogen compound metabolic process; P:small molecule metabolic process; P:cofactor metabolic process,EC:1.1.1.44,"Phosphogluconate dehydrogenase (NADP(+)-dependent, decarboxylating)",no IPS match,no IPS match,no IPS match
numpitch-3,R1047,R,15,14.9,"INTERPRO, BLASTED, MAPPED, GO-SLIM","6-phosphogluconate dehydrogenase, decarboxylating 1",20,5.62815E-23,97.87,5,P:GO:0005975; F:GO:0016491; P:GO:0034641; P:GO:0044281; P:GO:0051186,P:carbohydrate metabolic process; F:oxidoreductase activity; P:cellular nitrogen compound metabolic process; P:small molecule metabolic process; P:cofactor metabolic process,EC:1.1.1.44,"Phosphogluconate dehydrogenase (NADP(+)-dependent, decarboxylating)",IPR006114 (PFAM); IPR013328 (G3DSA:1.10.1040.GENE3D); PTHR11811 (PANTHER); PTHR11811:SF33 (PANTHER); IPR008927 (SUPERFAMILY),F:GO:0004616; P:GO:0006098; F:GO:0016491; P:GO:0055114,F:phosphogluconate dehydrogenase (decarboxylating) activity; P:pentose-phosphate shunt; F:oxidoreductase activity; P:oxidation-reduction process
,R3274,R,15,22.0,"INTERPRO, NO-BLAST",---NA---,,,,,,,,,no IPS match,no IPS match,no IPS match
,R1115,R,15,27.8,"INTERPRO, NO-BLAST",---NA---,,,,,,,,,mobidb-lite (MOBIDB_LITE),no GO terms,no GO terms
,R3785,R,15,43.1,"INTERPRO, BLASTED, MAPPED, GO-SLIM",haloacid dehalogenase-like hydrolase domain-containing protein 3,20,1.98285E-27,97.66,2,F:GO:0003674; P:GO:0008150,F:molecular_function; P:biological_process,,,no IPS match,no IPS match,no IPS match
,D223444,D,15,50.0,"INTERPRO, NO-BLAST",---NA---,,,,,,,,,no IPS match,no IPS match,no IPS match
,R8421,R,15,52.4,"INTERPRO, BLASTED, MAPPED, GO-SLIM",zinc finger CCCH domain-containing protein 14-like,20,1.39201E-12,76.58,2,F:GO:0003723; F:GO:0043167,F:RNA binding; F:ion binding,,,no IPS match,no IPS match,no IPS match
,R4718,R,15,58.7,"INTERPRO, NO-BLAST",---NA---,,,,,,,,,no IPS match,no IPS match,no IPS match
,R2471,R,16,0.0,"INTERPRO, NO-BLAST",---NA---,,,,,,,,,no IPS match,no IPS match,no IPS match
,R127,R,16,13.3,"INTERPRO, BLASTED, MAPPED, GO-SLIM","Peptidyl-prolyl cis-trans isomerase CYP38, chloroplastic",20,8.98555E-23,95.64,2,P:GO:0006464; F:GO:0016853,P:cellular protein modification process; F:isomerase activity,EC:5.2.1.8,Peptidylprolyl isomerase,no IPS match,no IPS match,no IPS match
,R2264,R,16,16.6,"INTERPRO, BLASTED",Futsch light chain LC(f) like,8,9.13359E-09,69.84,,,,,,no IPS match,no IPS match,no IPS match
,R2266,R,16,18.6,"INTERPRO, NO-BLAST",---NA---,,,,,,,,,no IPS match,no IPS match,no IPS match
,RI940,R,16,20.6,"INTERPRO, NO-BLAST",---NA---,,,,,,,,,no IPS match,no IPS match,no IPS match
,RI941,R,16,20.6,"INTERPRO, NO-BLAST",---NA---,,,,,,,,,no IPS match,no IPS match,no IPS match
,R7937,R,16,26.4,"INTERPRO, NO-BLAST",---NA---,,,,,,,,,PS51257 (PROSITE_PROFILES),no GO terms,no GO terms
,R7935,R,16,26.4,"INTERPRO, NO-BLAST",---NA---,,,,,,,,,no IPS match,no IPS match,no IPS match
,RI1505,R,16,26.4,"INTERPRO, BLASTED, MAPPED, GO-SLIM","Peptidyl-prolyl cis-trans isomerase CYP38, chloroplastic",20,8.98555E-23,95.64,2,P:GO:0006464; F:GO:0016853,P:cellular protein modification process; F:isomerase activity,EC:5.2.1.8,Peptidylprolyl isomerase,no IPS match,no IPS match,no IPS match
,R6000,R,16,27.6,"INTERPRO, BLASTED, MAPPED, GO-SLIM","formate dehydrogenase, mitochondrial",20,3.94668E-28,98.51,4,C:GO:0005739; P:GO:0009056; F:GO:0016491; P:GO:0044281,C:mitochondrion; P:catabolic process; F:oxidoreductase activity; P:small molecule metabolic process,EC:1.2.1.2,Acting on the aldehyde or oxo group of donors,no IPS match,no IPS match,no IPS match
,R124,R,16,27.6,"INTERPRO, BLASTED, MAPPED, GO-SLIM","Peptidyl-prolyl cis-trans isomerase CYP38, chloroplastic",20,4.32117E-24,97.55,5,P:GO:0006464; P:GO:0006950; C:GO:0009536; C:GO:0009579; F:GO:0016853,P:cellular protein modification process; P:response to stress; C:plastid; C:thylakoid; F:isomerase activity,EC:5.2.1.8,Peptidylprolyl isomerase,IPR029000 (G3DSA:2.40.100.GENE3D); PTHR43246:SF3 (PANTHER); PTHR43246 (PANTHER),no GO terms,no GO terms
smoothzn-6,R4706,R,16,33.2,"INTERPRO, BLASTED, MAPPED, GO-SLIM",binding partner of ACD11 1-like isoform X1,20,7.21312E-08,85.75,1,F:GO:0003723,F:RNA binding,,,PTHR44136 (PANTHER); PTHR44136:SF7 (PANTHER),no GO terms,no GO terms
,D305309,D,16,37.2,"INTERPRO, BLASTED, MAPPED, GO-SLIM",plant cysteine oxidase 2-like,20,1.00217E-23,95.06,6,C:GO:0005634; C:GO:0005829; P:GO:0006091; P:GO:0006464; P:GO:0006950; F:GO:0016491,C:nucleus; C:cytosol; P:generation of precursor metabolites and energy; P:cellular protein modification process; P:response to stress; F:oxidoreductase activity,EC:1.13.11,Acting on single donors with incorporation of molecular oxygen (oxygenases). The oxygen incorporated need not be derived from O(2),IPR012864 (PFAM); PTHR22966 (PANTHER); PTHR22966:SF1 (PANTHER),F:GO:0016702; P:GO:0055114,"F:oxidoreductase activity, acting on single donors with incorporation of molecular oxygen, incorporation of two atoms of oxygen; P:oxidation-reduction process"
heigwing-3,R1856,R,16,41.2,"INTERPRO, NO-BLAST",---NA---,,,,,,,,,no IPS match,no IPS match,no IPS match
,R7696,R,16,42.5,"INTERPRO, NO-BLAST",---NA---,,,,,,,,,no IPS match,no IPS match,no IPS match
,R4425,R,16,47.0,"INTERPRO, BLASTED, MAPPED",Thioredoxin-like fold protein,8,2.12501E-05,84.38,2,F:GO:0015035; P:GO:0055114,F:protein disulfide oxidoreductase activity; P:oxidation-reduction process,,,no IPS match,no IPS match,no IPS match
,R4418,R,16,50.4,"INTERPRO, BLASTED, MAPPED",Thioredoxin-like fold protein,8,2.12501E-05,84.38,2,F:GO:0015035; P:GO:0055114,F:protein disulfide oxidoreductase activity; P:oxidation-reduction process,,,no IPS match,no IPS match,no IPS match
,R4421,R,16,52.5,"INTERPRO, BLASTED, MAPPED, GO-SLIM",PREDICTED: uncharacterized protein LOC104102573 isoform X1,20,5.32152E-23,95.15,4,P:GO:0002376; C:GO:0005829; P:GO:0006950; F:GO:0016491,P:immune system process; C:cytosol; P:response to stress; F:oxidoreductase activity,,,G3DSA:3.40.30.10 (GENE3D); PTHR13887:SF38 (PANTHER); PTHR13887 (PANTHER),no GO terms,no GO terms
,R4423,R,16,55.9,"INTERPRO, BLASTED, MAPPED",Thioredoxin-like fold protein,8,2.12501E-05,84.38,2,F:GO:0015035; P:GO:0055114,F:protein disulfide oxidoreductase activity; P:oxidation-reduction process,,,no IPS match,no IPS match,no IPS match
,R4426,R,16,58.6,"INTERPRO, BLASTED, MAPPED, GO-SLIM",Thioredoxin-like fold protein,20,2.84807E-18,86.78,4,P:GO:0002376; C:GO:0005829; P:GO:0006950; F:GO:0016491,P:immune system process; C:cytosol; P:response to stress; F:oxidoreductase activity,,,no IPS match,no IPS match,no IPS match
,R5890,R,17,0.0,"INTERPRO, BLASTED, MAPPED",Peptidyl-prolyl cis-trans isomerase,4,5.00035E-12,67.91,4,P:GO:0000413; F:GO:0003755; P:GO:0006457; F:GO:0016853,P:protein peptidyl-prolyl isomerization; F:peptidyl-prolyl cis-trans isomerase activity; P:protein folding; F:isomerase activity,,,no IPS match,no IPS match,no IPS match
,R9360,R,17,7.4,"INTERPRO, NO-BLAST",---NA---,,,,,,,,,no IPS match,no IPS match,no IPS match
heigwing-4,D197566,D,17,18.0,"INTERPRO, BLASTED, MAPPED, GO-SLIM",Protein phosphatase,20,2.49508E-20,93.01,4,P:GO:0006464; F:GO:0016301; F:GO:0016791; F:GO:0043167,P:cellular protein modification process; F:kinase activity; F:phosphatase activity; F:ion binding,EC:3.1.3.16; EC:3.1.3.41,Protein-serine/threonine phosphatase; 4-nitrophenylphosphatase,IPR036457 (G3DSA:3.60.40.GENE3D); PTHR13832:SF266 (PANTHER); IPR015655 (PANTHER); IPR036457 (SUPERFAMILY),F:GO:0004722; P:GO:0006470,F:protein serine/threonine phosphatase activity; P:protein dephosphorylation
,R2669,R,17,25.5,"INTERPRO, NO-BLAST",---NA---,,,,,,,,,no IPS match,no IPS match,no IPS match
fenestra-15,R2675,R,17,27.5,"INTERPRO, NO-BLAST",---NA---,,,,,,,,,no IPS match,no IPS match,no IPS match
,D35023,D,17,39.7,"INTERPRO, NO-BLAST",---NA---,,,,,,,,,no IPS match,no IPS match,no IPS match
,R6532,R,17,54.8,"INTERPRO, BLASTED, MAPPED, GO-SLIM",60S ribosomal protein L32-1,20,1.14377E-14,97.34,3,F:GO:0003735; C:GO:0005840; P:GO:0006412,F:structural constituent of ribosome; C:ribosome; P:translation,,,IPR001515 (PFAM); IPR001515 (PANTHER); IPR001515 (PRODOM); IPR036351 (SUPERFAMILY),F:GO:0003735; C:GO:0005622; C:GO:0005840; P:GO:0006412,F:structural constituent of ribosome; C:intracellular; C:ribosome; P:translation
,R3689,R,18,0.0,"INTERPRO, BLASTED","gamma carbonic anhydrase-like 2, mitochondrial",10,0.000435187,97,,,,,,no IPS match,no IPS match,no IPS match
,R3690,R,18,0.0,"INTERPRO, BLASTED, MAPPED, GO-SLIM","gamma carbonic anhydrase-like 2, mitochondrial",20,1.94411E-12,92.97,1,F:GO:0016491,F:oxidoreductase activity,EC:1.6.99.5; EC:1.6.99.3; EC:1.6.5.3,Acting on NADH or NADPH; NADH dehydrogenase; NADH:ubiquinone reductase (H(+)-translocating),mobidb-lite (MOBIDB_LITE),no GO terms,no GO terms
widtspot,D126613,D,18,10.9,"INTERPRO, BLASTED, MAPPED, GO-SLIM",diacylglycerol kinase 1-like,20,2.02727E-27,99.79,4,C:GO:0005622; P:GO:0007165; F:GO:0016301; F:GO:0043167,C:intracellular; P:signal transduction; F:kinase activity; F:ion binding,EC:2.7.1.23; EC:2.7.1.107,NAD(+) kinase; Diacylglycerol kinase (ATP),IPR017438 (G3DSA:3.40.50.GENE3D); IPR001206 (PFAM); IPR037607 (PANTHER); PTHR11255:SF54 (PANTHER); IPR001206 (PROSITE_PROFILES); IPR016064 (SUPERFAMILY),F:GO:0003951; F:GO:0004143; P:GO:0007165; P:GO:0008152; F:GO:0016301,F:NAD+ kinase activity; F:diacylglycerol kinase activity; P:signal transduction; P:metabolic process; F:kinase activity
,D227486,D,18,12.3,"INTERPRO, BLASTED, MAPPED, GO-SLIM",diacylglycerol kinase 1-like,20,2.24911E-24,97.93,4,C:GO:0005622; P:GO:0007165; F:GO:0016301; F:GO:0043167,C:intracellular; P:signal transduction; F:kinase activity; F:ion binding,EC:2.7.1.23; EC:2.7.1.107,NAD(+) kinase; Diacylglycerol kinase (ATP),PTHR11255:SF54 (PANTHER); IPR037607 (PANTHER),F:GO:0004143; P:GO:0007165,F:diacylglycerol kinase activity; P:signal transduction
,R155,R,18,14.3,"INTERPRO, BLASTED, MAPPED","geranylgeranyl diphosphate reductase, chloroplastic",20,8.24702E-07,97.8,16,P:GO:0008033; C:GO:0009507; C:GO:0009534; C:GO:0009535; C:GO:0009941; P:GO:0015979; P:GO:0015995; C:GO:0016020; F:GO:0016491; F:GO:0016628; F:GO:0045550; F:GO:0050660; P:GO:0051188; P:GO:0055114; F:GO:0071949; F:GO:0102067,"P:tRNA processing; C:chloroplast; C:chloroplast thylakoid; C:chloroplast thylakoid membrane; C:chloroplast envelope; P:photosynthesis; P:chlorophyll biosynthetic process; C:membrane; F:oxidoreductase activity; F:oxidoreductase activity, acting on the CH-CH group of donors, NAD or NADP as acceptor; F:geranylgeranyl reductase activity; F:flavin adenine dinucleotide binding; P:cofactor biosynthetic process; P:oxidation-reduction process; F:FAD binding; F:geranylgeranyl diphosphate reductase activity",,,no IPS match,no IPS match,no IPS match
,R740,R,18,17.7,"INTERPRO, BLASTED, MAPPED, GO-SLIM",CBL-interacting serine/threonine-protein kinase 6-like,20,3.2241E-25,97.98,5,C:GO:0005622; P:GO:0006464; P:GO:0007165; F:GO:0016301; F:GO:0043167,C:intracellular; P:cellular protein modification process; P:signal transduction; F:kinase activity; F:ion binding,EC:2.7.11,Transferring phosphorus-containing groups,G3DSA:1.10.510.10 (GENE3D); IPR000719 (PFAM); IPR020636 (PANTHER); PTHR43895:SF8 (PANTHER); IPR000719 (PROSITE_PROFILES); IPR011009 (SUPERFAMILY),F:GO:0004672; F:GO:0005524; P:GO:0006468,F:protein kinase activity; F:ATP binding; P:protein phosphorylation
numpitch-4,RI18,R,18,22.2,"INTERPRO, BLASTED, MAPPED, GO-SLIM",eukaryotic translation initiation factor 5a-2,20,7.45348E-10,99.5,1,F:GO:0008135,"F:translation factor activity, RNA binding",,,no IPS match,no IPS match,no IPS match
,R1718,R,18,22.2,"INTERPRO, NO-BLAST",---NA---,,,,,,,,,no IPS match,no IPS match,no IPS match
,R6575,R,18,26.4,"INTERPRO, BLASTED",EIN3-binding F-box protein 1-like,20,8.02769E-19,90.83,,,,,,IPR032675 (G3DSA:3.80.10.GENE3D); PTHR44327 (PANTHER); PTHR44327:SF1 (PANTHER),no GO terms,no GO terms
,R6573,R,18,26.4,"INTERPRO, BLASTED",EIN3-binding F-box protein 1-like,20,9.08714E-19,90.83,,,,,,IPR032675 (G3DSA:3.80.10.GENE3D); PTHR44327:SF1 (PANTHER); PTHR44327 (PANTHER),no GO terms,no GO terms
,R7182,R,18,31.0,"INTERPRO, NO-BLAST",---NA---,,,,,,,,,no IPS match,no IPS match,no IPS match
,R7181,R,18,31.0,"INTERPRO, BLASTED, MAPPED, GO-SLIM",probable histone H2A variant 3,20,4.85357E-24,100,4,F:GO:0003677; C:GO:0005634; C:GO:0005694; C:GO:0032991,F:DNA binding; C:nucleus; C:chromosome; C:protein-containing complex,,,IPR002119 (PRINTS); IPR032454 (PFAM); IPR009072 (G3DSA:1.10.20.GENE3D); PTHR23430 (PANTHER); PTHR23430:SF105 (PANTHER); IPR009072 (SUPERFAMILY),C:GO:0000786; F:GO:0003677; C:GO:0005634; F:GO:0046982,C:nucleosome; F:DNA binding; C:nucleus; F:protein heterodimerization activity
,R7180,R,18,31.5,"INTERPRO, NO-BLAST",---NA---,,,,,,,,,no IPS match,no IPS match,no IPS match
,RI1329,R,18,33.2,"INTERPRO, BLASTED, MAPPED, GO-SLIM","heme-binding-like protein At3g10130, chloroplastic isoform X2",20,7.74729E-10,89.66,4,F:GO:0003674; P:GO:0006950; C:GO:0009536; C:GO:0009579,F:molecular_function; P:response to stress; C:plastid; C:thylakoid,,,no IPS match,no IPS match,no IPS match
leafcolr-2,R1315,R,18,33.2,"INTERPRO, BLASTED","heme-binding-like protein At3g10130, chloroplastic isoform X2",20,2.07804E-14,84.57,,,,,,no IPS match,no IPS match,no IPS match
,R6478,R,18,42.7,"INTERPRO, BLASTED, MAPPED, GO-SLIM",Hexokinase-1 like,20,1.44104E-28,98.19,10,P:GO:0005975; P:GO:0006091; P:GO:0009058; C:GO:0009536; F:GO:0016301; P:GO:0034655; P:GO:0042592; F:GO:0043167; P:GO:0044281; P:GO:0051186,P:carbohydrate metabolic process; P:generation of precursor metabolites and energy; P:biosynthetic process; C:plastid; F:kinase activity; P:nucleobase-containing compound catabolic process; P:homeostatic process; F:ion binding; P:small molecule metabolic process; P:cofactor metabolic process,EC:2.7.1.1,Hexokinase,G3DSA:3.40.367.20 (GENE3D); IPR022673 (PFAM); PTHR19443:SF52 (PANTHER); IPR001312 (PANTHER); SSF53067 (SUPERFAMILY),P:GO:0001678; F:GO:0004396; F:GO:0005524; F:GO:0005536; P:GO:0005975; F:GO:0016773,"P:cellular glucose homeostasis; F:hexokinase activity; F:ATP binding; F:glucose binding; P:carbohydrate metabolic process; F:phosphotransferase activity, alcohol group as acceptor"
fenestra-8,R6464,R,18,47.3,"INTERPRO, BLASTED, MAPPED, GO-SLIM",Hexokinase-1 like,20,5.7673E-14,88.75,11,C:GO:0005829; P:GO:0005975; P:GO:0006091; P:GO:0009058; C:GO:0009536; F:GO:0016301; P:GO:0034655; P:GO:0042592; F:GO:0043167; P:GO:0044281; P:GO:0051186,C:cytosol; P:carbohydrate metabolic process; P:generation of precursor metabolites and energy; P:biosynthetic process; C:plastid; F:kinase activity; P:nucleobase-containing compound catabolic process; P:homeostatic process; F:ion binding; P:small molecule metabolic process; P:cofactor metabolic process,EC:2.7.1.7; EC:2.7.1.4; EC:2.7.1.2; EC:2.7.1.1,Mannokinase; Fructokinase; Glucokinase; Hexokinase,G3DSA:3.40.367.20 (GENE3D); IPR022673 (PFAM); PTHR19443:SF52 (PANTHER); IPR001312 (PANTHER); SSF53067 (SUPERFAMILY),P:GO:0001678; F:GO:0004396; F:GO:0005524; F:GO:0005536; P:GO:0005975; F:GO:0016773,"P:cellular glucose homeostasis; F:hexokinase activity; F:ATP binding; F:glucose binding; P:carbohydrate metabolic process; F:phosphotransferase activity, alcohol group as acceptor"
,D378305,D,19,0.0,"INTERPRO, NO-BLAST",---NA---,,,,,,,,,no IPS match,no IPS match,no IPS match
,R5790,R,19,11.9,"INTERPRO, BLASTED, MAPPED, GO-SLIM","sedoheptulose-1,7-bisphosphatase, chloroplastic",20,1.40438E-15,99.44,5,P:GO:0005975; P:GO:0009058; C:GO:0009536; F:GO:0016791; P:GO:0044281,P:carbohydrate metabolic process; P:biosynthetic process; C:plastid; F:phosphatase activity; P:small molecule metabolic process,EC:3.1.3.37; EC:3.1.3.23; EC:3.1.3.11; EC:3.1.3.41,Sedoheptulose-bisphosphatase; Sugar-phosphatase; Fructose-bisphosphatase; 4-nitrophenylphosphatase,no IPS match,no IPS match,no IPS match
fenestra-13,R4633,R,19,20.9,"INTERPRO, BLASTED, MAPPED, GO-SLIM",60S ribosomal protein L35,20,9.40356E-25,100,6,F:GO:0003729; F:GO:0003735; C:GO:0005829; C:GO:0005840; P:GO:0006412; P:GO:0042254,F:mRNA binding; F:structural constituent of ribosome; C:cytosol; C:ribosome; P:translation; P:ribosome biogenesis,,,G3DSA:1.10.20.90 (GENE3D); PTHR13872 (PANTHER); PTHR13872:SF36 (PANTHER),no GO terms,no GO terms
,R4120,R,19,25.4,"INTERPRO, BLASTED, MAPPED, GO-SLIM",dnaJ protein homolog,20,7.11404E-26,99.68,4,P:GO:0006457; P:GO:0006950; F:GO:0043167; F:GO:0051082,P:protein folding; P:response to stress; F:ion binding; F:unfolded protein binding,,,PTHR43888:SF4 (PANTHER); PTHR43888 (PANTHER),no GO terms,no GO terms
,R705,R,19,25.9,"INTERPRO, BLASTED, MAPPED, GO-SLIM",dnaJ protein homolog,20,5.94785E-23,94.68,4,P:GO:0006457; P:GO:0006950; F:GO:0043167; F:GO:0051082,P:protein folding; P:response to stress; F:ion binding; F:unfolded protein binding,,,PTHR43888:SF4 (PANTHER); PTHR43888 (PANTHER),no GO terms,no GO terms
,R3736,R,19,26.4,"INTERPRO, NO-BLAST",---NA---,,,,,,,,,no IPS match,no IPS match,no IPS match
,R2649,R,19,26.4,INTERPRO,,,,,,,,,,no IPS match,no IPS match,no IPS match
,RI1550,R,19,27.9,INTERPRO,,,,,,,,,,no IPS match,no IPS match,no IPS match
,R5810,R,19,33.1,"INTERPRO, NO-BLAST",---NA---,,,,,,,,,mobidb-lite (MOBIDB_LITE),no GO terms,no GO terms
,R5808,R,19,38.6,"INTERPRO, NO-BLAST",---NA---,,,,,,,,,no IPS match,no IPS match,no IPS match
,R8139,R,20,0.0,"INTERPRO, BLASTED, MAPPED, GO-SLIM","3-oxoacyl-[acyl-carrier-protein] synthase I, chloroplastic-like",20,4.05222E-27,96.28,4,P:GO:0006629; P:GO:0009058; F:GO:0016746; P:GO:0044281,"P:lipid metabolic process; P:biosynthetic process; F:transferase activity, transferring acyl groups; P:small molecule metabolic process",,,no IPS match,no IPS match,no IPS match
,R8140,R,20,2.4,INTERPRO,,,,,,,,,,no IPS match,no IPS match,no IPS match
,R6682,R,20,6.5,INTERPRO,,,,,,,,,,no IPS match,no IPS match,no IPS match
,D168796,D,20,6.5,"INTERPRO, NO-BLAST",---NA---,,,,,,,,,no IPS match,no IPS match,no IPS match
,R5361,R,20,9.7,"INTERPRO, BLASTED, MAPPED, GO-SLIM",choline-phosphate cytidylyltransferase 1-like,20,2.22559E-26,97.87,2,P:GO:0009058; F:GO:0016779,P:biosynthetic process; F:nucleotidyltransferase activity,,,IPR004821 (PFAM); IPR014729 (G3DSA:3.40.50.GENE3D); PTHR10739:SF28 (PANTHER); PTHR10739 (PANTHER); SSF52374 (SUPERFAMILY),F:GO:0003824; P:GO:0009058,F:catalytic activity; P:biosynthetic process
,RI790,R,20,11.7,INTERPRO,,,,,,,,,,IPR004088 (PFAM); IPR036612 (G3DSA:3.30.1370.GENE3D); PTHR10288:SF137 (PANTHER); PTHR10288 (PANTHER); PS50084 (PROSITE_PROFILES); IPR036612 (SUPERFAMILY),F:GO:0003723,F:RNA binding
openfrac-2,R6925,R,20,26.8,"INTERPRO, NO-BLAST",---NA---,,,,,,,,,no IPS match,no IPS match,no IPS match
,R807,R,20,31.5,"INTERPRO, BLASTED, MAPPED","UPF0051 protein ABCI8, chloroplastic",20,6.86241E-22,72.97,2,F:GO:0005524; P:GO:0016226,F:ATP binding; P:iron-sulfur cluster assembly,,,no IPS match,no IPS match,no IPS match
,RI1621,R,21,0.0,"INTERPRO, BLASTED, MAPPED, GO-SLIM",V-type proton ATPase 16 kDa proteolipid subunit-like,20,4.04965E-12,98.1,3,C:GO:0005773; F:GO:0022857; C:GO:0032991,C:vacuole; F:transmembrane transporter activity; C:protein-containing complex,,,no IPS match,no IPS match,no IPS match
,R7379,R,21,15.9,INTERPRO,,,,,,,,,,no IPS match,no IPS match,no IPS match
,R7387,R,21,16.6,INTERPRO,,,,,,,,,,no IPS match,no IPS match,no IPS match
,R7377,R,21,17.9,"INTERPRO, BLASTED, MAPPED, GO-SLIM",SKP1-like protein 1B,20,1.90854E-25,97.23,3,P:GO:0009056; F:GO:0016301; F:GO:0016874,P:catabolic process; F:kinase activity; F:ligase activity,,,no IPS match,no IPS match,no IPS match
,RI796,R,21,17.9,"INTERPRO, BLASTED, MAPPED, GO-SLIM",SKP1-like protein 1B,20,1.0783E-25,97.87,3,P:GO:0009056; F:GO:0016301; F:GO:0016874,P:catabolic process; F:kinase activity; F:ligase activity,,,IPR016072 (PFAM); G3DSA:3.30.710.10 (GENE3D); PTHR11165 (PANTHER); IPR036296 (SUPERFAMILY),P:GO:0006511,P:ubiquitin-dependent protein catabolic process
,RI794,R,21,17.9,"INTERPRO, BLASTED, MAPPED, GO-SLIM",SKP1-like protein 1B,20,1.90854E-25,97.23,3,P:GO:0009056; F:GO:0016301; F:GO:0016874,P:catabolic process; F:kinase activity; F:ligase activity,,,no IPS match,no IPS match,no IPS match
,RI795,R,21,19.1,"INTERPRO, BLASTED, MAPPED, GO-SLIM",SKP1-like protein 1B,20,1.88865E-20,87.78,3,P:GO:0000003; P:GO:0009056; P:GO:0009790,P:reproduction; P:catabolic process; P:embryo development,,,G3DSA:3.30.710.10 (GENE3D); IPR016073 (PFAM); IPR011333 (SUPERFAMILY),P:GO:0006511,P:ubiquitin-dependent protein catabolic process
,R7376,R,21,19.1,"INTERPRO, BLASTED, MAPPED, GO-SLIM",SKP1-like protein 1B,20,1.19486E-21,88.39,3,P:GO:0000003; P:GO:0009056; P:GO:0009790,P:reproduction; P:catabolic process; P:embryo development,,,G3DSA:3.30.710.10 (GENE3D); IPR016073 (PFAM); PTHR11165 (PANTHER); PTHR11165:SF89 (PANTHER); IPR011333 (SUPERFAMILY),P:GO:0006511,P:ubiquitin-dependent protein catabolic process
,R3112,R,21,21.2,"INTERPRO, NO-BLAST",---NA---,,,,,,,,,no IPS match,no IPS match,no IPS match
,R5473,R,21,27.1,"INTERPRO, BLASTED",deSI-like protein At4g17486 isoform X1,20,8.71947E-06,84.07,,,,,,no IPS match,no IPS match,no IPS match
"smoothzn-4, widtleaf-2",S177374,S,22,0.0,,,,,,,,,,,,,
,R4329,R,22,16.4,"INTERPRO, NO-BLAST",---NA---,,,,,,,,,no IPS match,no IPS match,no IPS match
,R4327,R,22,16.4,"INTERPRO, NO-BLAST",---NA---,,,,,,,,,no IPS match,no IPS match,no IPS match
,R7820,R,22,20.0,"INTERPRO, BLASTED, MAPPED, GO-SLIM",cytosolic malate dehydrogenase,20,8.64381E-27,99.89,9,C:GO:0005576; C:GO:0005829; C:GO:0005886; P:GO:0005975; P:GO:0006091; F:GO:0016491; P:GO:0034641; P:GO:0044281; P:GO:0051186,C:extracellular region; C:cytosol; C:plasma membrane; P:carbohydrate metabolic process; P:generation of precursor metabolites and energy; F:oxidoreductase activity; P:cellular nitrogen compound metabolic process; P:small molecule metabolic process; P:cofactor metabolic process,EC:1.1.1.37,Malate dehydrogenase,IPR022383 (PFAM); IPR015955 (G3DSA:3.90.110.GENE3D); IPR010945 (PANTHER); PTHR23382:SF5 (PANTHER); IPR015955 (SUPERFAMILY),F:GO:0003824; P:GO:0005975; P:GO:0006108; F:GO:0016615; F:GO:0016616; P:GO:0055114,"F:catalytic activity; P:carbohydrate metabolic process; P:malate metabolic process; F:malate dehydrogenase activity; F:oxidoreductase activity, acting on the CH-OH group of donors, NAD or NADP as acceptor; P:oxidation-reduction process"
,R7819,R,22,21.5,"INTERPRO, BLASTED, MAPPED, GO-SLIM",putative cytosolic malate dehydrogenase,20,6.70127E-25,97.23,7,C:GO:0005737; P:GO:0005975; P:GO:0006091; F:GO:0016491; P:GO:0034641; P:GO:0044281; P:GO:0051186,C:cytoplasm; P:carbohydrate metabolic process; P:generation of precursor metabolites and energy; F:oxidoreductase activity; P:cellular nitrogen compound metabolic process; P:small molecule metabolic process; P:cofactor metabolic process,EC:1.1.1.37,Malate dehydrogenase,no IPS match,no IPS match,no IPS match
,R5850,R,22,24.0,"INTERPRO, NO-BLAST",---NA---,,,,,,,,,no IPS match,no IPS match,no IPS match
,R2747,R,23,0.0,"INTERPRO, BLASTED, MAPPED, GO-SLIM",ferredoxin-NADP reductase,20,9.44242E-28,99.89,2,C:GO:0009536; F:GO:0016491,C:plastid; F:oxidoreductase activity,EC:1.18.1; EC:1.18.1.2,Acting on iron-sulfur proteins as donors; Ferredoxin--NADP(+) reductase,no IPS match,no IPS match,no IPS match
,R2748,R,23,2.5,"INTERPRO, BLASTED, MAPPED, GO-SLIM","ferredoxin--NADP reductase, leaf isozyme, chloroplastic",20,3.27513E-26,99.47,2,C:GO:0009536; F:GO:0016491,C:plastid; F:oxidoreductase activity,EC:1.18.1; EC:1.18.1.2,Acting on iron-sulfur proteins as donors; Ferredoxin--NADP(+) reductase,no IPS match,no IPS match,no IPS match
,R7356,R,23,21.6,"INTERPRO, BLASTED, MAPPED, GO-SLIM",40S ribosomal protein S6,20,2.19656E-17,100,3,F:GO:0003735; C:GO:0005840; P:GO:0006412,F:structural constituent of ribosome; C:ribosome; P:translation,,,IPR001377 (PFAM); IPR001377 (PANTHER); PTHR11502:SF12 (PANTHER),F:GO:0003735; C:GO:0005622; C:GO:0005840; P:GO:0006412,F:structural constituent of ribosome; C:intracellular; C:ribosome; P:translation
,R7357,R,23,21.6,"INTERPRO, BLASTED, MAPPED, GO-SLIM",ribosomal s6 RPS6-2 family protein,20,3.36855E-26,99.79,3,F:GO:0003735; C:GO:0005840; P:GO:0006412,F:structural constituent of ribosome; C:ribosome; P:translation,,,no IPS match,no IPS match,no IPS match
,D374124,D,24,0.0,INTERPRO,,,,,,,,,,mobidb-lite (MOBIDB_LITE),no GO terms,no GO terms
,D251238,D,24,2.7,"INTERPRO, NO-BLAST",---NA---,,,,,,,,,no IPS match,no IPS match,no IPS match
,D80352,D,24,5.6,"INTERPRO, NO-BLAST",---NA---,,,,,,,,,no IPS match,no IPS match,no IPS match
,D371916,D,24,9.8,"INTERPRO, NO-BLAST",---NA---,,,,,,,,,no IPS match,no IPS match,no IPS match
,D160256,D,24,14.4,"INTERPRO, NO-BLAST",---NA---,,,,,,,,,G3DSA:2.40.50.140 (GENE3D),no GO terms,no GO terms
,D198804,D,24,20.0,"INTERPRO, NO-BLAST",---NA---,,,,,,,,,mobidb-lite (MOBIDB_LITE),no GO terms,no GO terms
,R5427,R,25,0.0,"INTERPRO, BLASTED, MAPPED, GO-SLIM",4-hydroxyphenylpyruvate dioxygenase,20,2.35276E-25,100,5,C:GO:0005829; P:GO:0006520; P:GO:0009056; F:GO:0016491; F:GO:0043167,C:cytosol; P:cellular amino acid metabolic process; P:catabolic process; F:oxidoreductase activity; F:ion binding,EC:1.13.11; EC:1.13.11.27,Acting on single donors with incorporation of molecular oxygen (oxygenases). The oxygen incorporated need not be derived from O(2); 4-hydroxyphenylpyruvate dioxygenase,IPR029068 (G3DSA:3.10.180.GENE3D); IPR005956 (PANTHER); PTHR11959:SF1 (PANTHER); IPR029068 (SUPERFAMILY),F:GO:0003868; P:GO:0009072; F:GO:0016701; P:GO:0055114,"F:4-hydroxyphenylpyruvate dioxygenase activity; P:aromatic amino acid family metabolic process; F:oxidoreductase activity, acting on single donors with incorporation of molecular oxygen; P:oxidation-reduction process"
,R5992,R,25,5.1,"INTERPRO, BLASTED, MAPPED, GO-SLIM","myosin heavy chain, non-muscle",20,3.49743E-09,76.6,1,C:GO:0005575,C:cellular_component,,,no IPS match,no IPS match,no IPS match
,R7331,R,25,15.2,"INTERPRO, NO-BLAST",---NA---,,,,,,,,,no IPS match,no IPS match,no IPS match
,R7330,R,25,19.4,"INTERPRO, NO-BLAST",---NA---,,,,,,,,,mobidb-lite (MOBIDB_LITE),no GO terms,no GO terms
,R4663,R,26,0.0,"INTERPRO, NO-BLAST",---NA---,,,,,,,,,no IPS match,no IPS match,no IPS match
,R4662,R,26,0.0,INTERPRO,,,,,,,,,,no IPS match,no IPS match,no IPS match
"numpitch-1, fenestra-2",D163468,D,26,3.8,"INTERPRO, BLASTED, MAPPED, GO-SLIM",probable flavin-containing monooxygenase 1,20,1.86595E-20,91.22,2,F:GO:0016491; F:GO:0043167,F:oxidoreductase activity; F:ion binding,EC:1.14.13.8; EC:1.14.13,"Flavin-containing monooxygenase; Acting on paired donors, with incorporation or reduction of molecular oxygen. The oxygen incorporated need not be derived from O(2)",PTHR23023 (PANTHER); PTHR23023:SF164 (PANTHER),no GO terms,no GO terms
,R3279,R,26,8.2,"INTERPRO, NO-BLAST",---NA---,,,,,,,,,no IPS match,no IPS match,no IPS match
,R4653,R,26,12.9,"INTERPRO, BLASTED, MAPPED, GO-SLIM",110 kDa U5 small nuclear ribonucleoprotein component CLO,20,1.0659E-29,100,4,F:GO:0003924; C:GO:0005840; F:GO:0008135; F:GO:0043167,"F:GTPase activity; C:ribosome; F:translation factor activity, RNA binding; F:ion binding",EC:3.6.1.15,Nucleoside-triphosphate phosphatase,no IPS match,no IPS match,no IPS match
,R2820,R,26,13.5,"INTERPRO, NO-BLAST",---NA---,,,,,,,,,no IPS match,no IPS match,no IPS match
,R7235,R,26,13.5,"INTERPRO, BLASTED, MAPPED, GO-SLIM",aleurain-like protease,20,7.95673E-07,100,1,F:GO:0008233,F:peptidase activity,,,no IPS match,no IPS match,no IPS match
,R2819,R,26,14.5,"INTERPRO, NO-BLAST",---NA---,,,,,,,,,no IPS match,no IPS match,no IPS match
,R8884,R,26,17.2,"INTERPRO, BLASTED",polyadenylate-binding protein-interacting protein 7-like,20,4.64751E-19,89.9,,,,,,no IPS match,no IPS match,no IPS match
,D209873,D,27,0.0,"INTERPRO, NO-BLAST",---NA---,,,,,,,,,mobidb-lite (MOBIDB_LITE),no GO terms,no GO terms
,D498304,D,27,7.7,"INTERPRO, NO-BLAST",---NA---,,,,,,,,,IPR034804 (G3DSA:1.20.1300.GENE3D); IPR000701 (PFAM); IPR034804 (SUPERFAMILY),C:GO:0016020; F:GO:0016627,"C:membrane; F:oxidoreductase activity, acting on the CH-CH group of donors"
,D418812,D,27,13.0,INTERPRO,,,,,,,,,,PTHR37958 (PANTHER),no GO terms,no GO terms
,R3998,R,28,0.0,"INTERPRO, NO-BLAST",---NA---,,,,,,,,,no IPS match,no IPS match,no IPS match
,R4000,R,28,4.6,INTERPRO,,,,,,,,,,no IPS match,no IPS match,no IPS match
,R4090,R,28,11.5,"INTERPRO, NO-BLAST",---NA---,,,,,,,,,no IPS match,no IPS match,no IPS match
smoothzn-9,R3218,R,29,0.0,"INTERPRO, NO-BLAST",---NA---,,,,,,,,,no IPS match,no IPS match,no IPS match
,R7914,R,29,7.3,"INTERPRO, NO-BLAST",---NA---,,,,,,,,,mobidb-lite (MOBIDB_LITE),no GO terms,no GO terms
,R7905,R,29,7.7,"INTERPRO, BLASTED",abscisic acid receptor PYL9,20,4.1633E-25,99.36,,,,,,no IPS match,no IPS match,no IPS match
,R7900,R,29,10.6,"INTERPRO, BLASTED",abscisic acid receptor PYL9-like,20,1.34237E-21,96.14,,,,,,IPR023393 (G3DSA:3.30.530.GENE3D); PTHR31213 (PANTHER); PTHR31213:SF4 (PANTHER); SSF55961 (SUPERFAMILY),no GO terms,no GO terms
,D170439,D,30,0.0,"INTERPRO, NO-BLAST",---NA---,,,,,,,,,no IPS match,no IPS match,no IPS match
,R8273,R,30,2.5,"INTERPRO, NO-BLAST",---NA---,,,,,,,,,no IPS match,no IPS match,no IPS match
"numpitch-2, heigwing-2",S151516,S,30,10.4,,,,,,,,,,,,,
numpitch-5,RI787,R,31,0.0,"INTERPRO, NO-BLAST",---NA---,,,,,,,,,no IPS match,no IPS match,no IPS match
,R3316,R,31,9.8,"INTERPRO, NO-BLAST",---NA---,,,,,,,,,no IPS match,no IPS match,no IPS match
,D86651,D,32,0.0,"INTERPRO, NO-BLAST",---NA---,,,,,,,,,no IPS match,no IPS match,no IPS match
,D330545,D,32,8.4,"INTERPRO, NO-BLAST",---NA---,,,,,,,,,no IPS match,no IPS match,no IPS match
,R1326,R,33,0.0,"INTERPRO, BLASTED, MAPPED, GO-SLIM",40S ribosomal protein S29,20,7.55913E-16,100,3,F:GO:0003735; C:GO:0005840; P:GO:0006412,F:structural constituent of ribosome; C:ribosome; P:translation,,,no IPS match,no IPS match,no IPS match
,R1330,R,33,6.2,"INTERPRO, BLASTED, MAPPED, GO-SLIM",40S ribosomal protein S29,20,1.13384E-10,100,3,F:GO:0003735; C:GO:0005840; P:GO:0006412,F:structural constituent of ribosome; C:ribosome; P:translation,,,no IPS match,no IPS match,no IPS match
,R597,R,34,0.0,"INTERPRO, NO-BLAST",---NA---,,,,,,,,,no IPS match,no IPS match,no IPS match
,R604,R,34,0.6,"INTERPRO, BLASTED, MAPPED, GO-SLIM",14-3-3-like protein D isoform X1,20,6.38551E-25,95.43,1,F:GO:0003674,F:molecular_function,,,IPR036815 (G3DSA:1.20.190.GENE3D); IPR023410 (PFAM); IPR000308 (PANTHER); PTHR18860:SF31 (PANTHER); IPR036815 (SUPERFAMILY),F:GO:0019904,F:protein domain specific binding
fenestra-7,R600,R,34,1.0,"INTERPRO, BLASTED, MAPPED, GO-SLIM",14-3-3-like protein D isoform X1,20,3.27812E-16,95.77,1,F:GO:0003674,F:molecular_function,,,no IPS match,no IPS match,no IPS match
ptnwindw-2,D285722,D,34,6.0,"INTERPRO, NO-BLAST",---NA---,,,,,,,,,no IPS match,no IPS match,no IPS match
,D103653,D,35,0.0,"INTERPRO, BLASTED, MAPPED, GO-SLIM",ribosomal protein S12 (chloroplast),20,6.46009E-22,90.64,6,F:GO:0003735; C:GO:0005840; F:GO:0008135; C:GO:0009536; F:GO:0019843; F:GO:0043167,"F:structural constituent of ribosome; C:ribosome; F:translation factor activity, RNA binding; C:plastid; F:rRNA binding; F:ion binding",,,mobidb-lite (MOBIDB_LITE),no GO terms,no GO terms
,D125837,D,35,5.9,"INTERPRO, NO-BLAST",---NA---,,,,,,,,,no IPS match,no IPS match,no IPS match
,R203,R,36,0.0,"INTERPRO, BLASTED, MAPPED",metal transporter Nramp5-like,20,4.11009E-06,91.7,4,C:GO:0016020; C:GO:0016021; P:GO:0030001; F:GO:0046873,C:membrane; C:integral component of membrane; P:metal ion transport; F:metal ion transmembrane transporter activity,,,PTHR11706:SF38 (PANTHER); IPR001046 (PANTHER),C:GO:0016020; P:GO:0030001; F:GO:0046873,C:membrane; P:metal ion transport; F:metal ion transmembrane transporter activity
,R4473,R,36,4.5,"INTERPRO, BLASTED, MAPPED, GO-SLIM",replication factor C subunit 4,20,3.25944E-28,100,4,F:GO:0003677; P:GO:0006259; P:GO:0009058; F:GO:0043167,F:DNA binding; P:DNA metabolic process; P:biosynthetic process; F:ion binding,,,G3DSA:3.40.50.300 (GENE3D); IPR003959 (PFAM); PTHR11669:SF20 (PANTHER); PTHR11669 (PANTHER); cd00009 (CDD); IPR027417 (SUPERFAMILY),F:GO:0005524,F:ATP binding
,R3790,R,37,0.0,"INTERPRO, BLASTED, MAPPED, GO-SLIM","enoyl-CoA hydratase 2, peroxisomal",20,8.56304E-24,94.89,5,C:GO:0005777; P:GO:0006629; P:GO:0009056; F:GO:0016829; P:GO:0044281,C:peroxisome; P:lipid metabolic process; P:catabolic process; F:lyase activity; P:small molecule metabolic process,EC:4.2.1.107,"3-alpha,7-alpha,12-alpha-trihydroxy-5-beta-cholest-24-enoyl-CoA",G3DSA:3.10.129.10 (GENE3D),no GO terms,no GO terms
,R7767,R,37,3.8,"INTERPRO, BLASTED, MAPPED, GO-SLIM",plastocyanin,20,4.74347E-26,98.72,5,P:GO:0006091; C:GO:0009536; C:GO:0009579; F:GO:0016491; F:GO:0043167,P:generation of precursor metabolites and energy; C:plastid; C:thylakoid; F:oxidoreductase activity; F:ion binding,,,IPR000923 (PFAM); IPR008972 (G3DSA:2.60.40.GENE3D); PTHR34192:SF2 (PANTHER); PTHR34192 (PANTHER); IPR008972 (SUPERFAMILY),F:GO:0005507; F:GO:0009055,F:copper ion binding; F:electron transfer activity
,R7290,R,38,0.0,"INTERPRO, BLASTED, MAPPED, GO-SLIM","20 kDa chaperonin, chloroplastic-like",20,5.32433E-21,94.68,6,C:GO:0005739; P:GO:0006457; P:GO:0006950; C:GO:0009536; F:GO:0043167; F:GO:0051082,C:mitochondrion; P:protein folding; P:response to stress; C:plastid; F:ion binding; F:unfolded protein binding,EC:1.97.1,Other oxidoreductases,no IPS match,no IPS match,no IPS match
,R8906,R,38,2.6,"INTERPRO, BLASTED, MAPPED, GO-SLIM","20 kDa chaperonin, chloroplastic-like",20,2.83865E-08,93.7,4,C:GO:0005737; P:GO:0006457; P:GO:0006950; F:GO:0043167,C:cytoplasm; P:protein folding; P:response to stress; F:ion binding,EC:1.97.1,Other oxidoreductases,mobidb-lite (MOBIDB_LITE),no GO terms,no GO terms
,R8758,R,40,0.0,"INTERPRO, BLASTED, MAPPED, GO-SLIM","D-3-phosphoglycerate dehydrogenase 2, chloroplastic",20,1.14298E-18,92.72,3,P:GO:0006520; P:GO:0009058; F:GO:0016491,P:cellular amino acid metabolic process; P:biosynthetic process; F:oxidoreductase activity,EC:1.1.1.95,Phosphoglycerate dehydrogenase,no IPS match,no IPS match,no IPS match
smoothzn-1,R1429,R,42,0.0,"INTERPRO, BLASTED, MAPPED, GO-SLIM",mitochondrial pyruvate carrier 4,20,1.91197E-26,100,2,C:GO:0005739; F:GO:0022857,C:mitochondrion; F:transmembrane transporter activity,,,no IPS match,no IPS match,no IPS match
,R1430,R,42,0.0,"INTERPRO, BLASTED, MAPPED, GO-SLIM",mitochondrial pyruvate carrier 4,20,6.64378E-13,88.44,2,C:GO:0005739; P:GO:0055085,C:mitochondrion; P:transmembrane transport,,,no IPS match,no IPS match,no IPS match
,D280427,D,44,0.0,"INTERPRO, NO-BLAST",---NA---,,,,,,,,,no IPS match,no IPS match,no IPS match
,D455131,D,44,0.0,"INTERPRO, NO-BLAST",---NA---,,,,,,,,,no IPS match,no IPS match,no IPS match
,R3673,R,45,0.0,"INTERPRO, BLASTED, MAPPED, GO-SLIM",peroxisomal and mitochondrial division factor 2-like,10,1.18583E-18,80.86,1,C:GO:0005575,C:cellular_component,,,no IPS match,no IPS match,no IPS match
,R3676,R,45,0.0,"INTERPRO, BLASTED",Peroxisomal and mitochondrial division factor like,3,1.37563E-09,94.44,,,,,,mobidb-lite (MOBIDB_LITE),no GO terms,no GO terms
